# Supplementary material for: Genetic variability and genotype by environment interaction of two major cassava processed products in multi-environments
Source: Frontiers journal article supplement (doi:10.3389/fpls.2022.974795), 2022-10-17
Supplement: Data_Sheet_1.xls [file Data_Sheet_1.xls]

## Sheet: S1 Sixty seven genotypes 
	S1 Sixty seven genotypes
geno	group	genotype
IITA-TMS-IBA000070	check	IITA-TMS-IBA000070
IITA-TMS-IBA30572	check	IITA-TMS-IBA30572
IITA-TMS-IBA980581	check	IITA-TMS-IBA980581
IITA-TMS-IBA982101	check	IITA-TMS-IBA982101
TMEB419	check	TMEB419
TMS13F1021P0008	Dataset1	G1
TMS13F1049P0001	Dataset2	G2
TMS13F1114P0001	Dataset2	G3
TMS13F1126P0003	Dataset2	G4
TMS13F1182P0002	Dataset2	G5
TMS13F1304P0003	Dataset2	G6
TMS13F1315P0008	Dataset2	G7
TMS13F1376P0018	Dataset2	G8
TMS13F1400P0001	Dataset2	G9
TMS13F1461P0002	Dataset2	G10
TMS13F2061P0005	Dataset2	G11
TMS13F2207P0001	Dataset2	G12
TMS14F1001P0004	Dataset2	G13
TMS14F1013P0007	Dataset2	G14
TMS14F1014P0016	Dataset2	G15
TMS14F1014P0017	Dataset2	G16
TMS14F1016P0006	Dataset2	G17
TMS14F1019P0015	Dataset2	G18
TMS14F1022P0003	Dataset2	G19
TMS14F1022P0006	Dataset1	G20
TMS14F1035P0004	Dataset1	G21
TMS14F1035P0007	Dataset2	G22
TMS14F1036P0007	Dataset2	G23
TMS14F1049P0001	Dataset2	G24
TMS14F1098P0013	Dataset2	G25
TMS14F1120P0003	Dataset2	G26
TMS14F1125P0010	Dataset2	G27
TMS14F1131P0001	Dataset2	G28
TMS14F1146P0002	Dataset2	G29
TMS14F1159P0003	Dataset2	G30
TMS14F1194P0002	Dataset2	G31
TMS14F1195P0004	Dataset2	G32
TMS14F1195P0005	Dataset2	G33
TMS14F1196P0003	Dataset2	G34
TMS14F1208P0007	Dataset2	G35
TMS14F1223P0007	Dataset2	G36
TMS14F1224P0004	Dataset2	G37
TMS14F1262P0002	Dataset2	G38
TMS14F1278P0003	Dataset2	G39
TMS14F1285P0006	Dataset2	G40
TMS14F1285P0017	Dataset2	G41
TMS14F1287P0008	Dataset2	G42
TMS14F1288P0008	Dataset2	G43
TMS14F1291P0003	Dataset2	G62
TMS14F1291P0011	Dataset2	G44
TMS14F1291P0012	Dataset2	G45
TMS14F1292P0012	Dataset2	G46
TMS14F1295P0012	Dataset2	G47
TMS14F1297P0019	Dataset2	G48
TMS14F1299P0007	Dataset2	G49
TMS14F1300P0002	Dataset2	G50
TMS14F1300P0008	Dataset2	G51
TMS14F1301P0004	Dataset2	G52
TMS14F1301P0013	Dataset2	G53
TMS14F1303P0012	Dataset2	G54
TMS14F1306P0008	Dataset2	G55
TMS14F1306P0015	Dataset2	G56
TMS14F1306P0020	Dataset2	G57
TMS14F1310P0004	Dataset2	G58
TMS14F1310P0015	Dataset2	G59
TMS14F1311P0002	Dataset2	G60
TMS14F1312P0003	Dataset2	G61

## Sheet: S2 Standard heritability
Standard heritability estimates for 12 processed product and yield related traits.
Trait	Standard_Heritability Estimates
Root size	0.603069
Fibre content	0.628527
Dry root yield	0.694169
gari%	0.709852
gari_yield	0.722065
fufu%	0.723298
Fresh_root_yield	0.75134
Dry_matter_content	0.778122
Root number	0.785386
fufu_yield	0.787172
Peel loss	0.809633
Harvest index	0.827491

## Sheet: S3 variance component
Variance components fixed model for 12 Processed product and yield related traits
Traits	terms	Varaince component	std.error	z.ratio	%explained	P_value
Dry matter content	Env	8.62741	4.65706	1.85254	45.2646	0.07173
Dry matter content	Env:rep	0.0942849	0.0764706	1.23296	0.494676	0.18655
Dry matter content	Geno	2.43123	0.543045	4.47703	12.7557	2e-05
Dry matter content	Geno:Env	3.18502	0.356068	8.94497	16.7105	0
Dry matter content	Residual	4.722	0.236352	19.9787	24.7745
Dry matter content	Total	19.0599
Dry root yield	Env	12.6449	6.83292	1.85058	53.5173	0.07199
Dry root yield	Env:rep	0.293325	0.171332	1.71202	1.24145	0.09214
Dry root yield	Geno	1.67672	0.417449	4.01658	7.09641	0.00013
Dry root yield	Geno:Env	2.80667	0.37337	7.51714	11.8787	0
Dry root yield	Residual	6.20609	0.308917	20.0899	26.2662
Dry root yield	Total	23.6277
Fibre content	Env	0.225685	0.172103	1.31134	16.871	0.16885
Fibre content	Env:rep	0.153587	0.0828788	1.85316	11.4813	0.07164
Fibre content	Geno	0.103124	0.0327846	3.14551	7.70899	0.00283
Fibre content	Geno:Env	0.119862	0.0461124	2.59934	8.9602	0.01361
Fibre content	Residual	0.735455	0.0515613	14.2637	54.9785
Fibre content	Total	1.33771
Fresh root yield	Env	72.4454	39.4927	1.8344	46.1596	0.07417
Fresh root yield	Env:rep	1.85598	1.13545	1.63458	1.18257	0.10489
Fresh root yield	Geno	16.1871	3.71898	4.35258	10.3139	3e-05
Fresh root yield	Geno:Env	19.2587	2.70581	7.11756	12.271	0
Fresh root yield	Residual	47.1982	2.33949	20.1746	30.073
Fresh root yield	Total	156.945
fufu yield	Env	4.59132	2.55746	1.79527	49.1145	0.07963
fufu yield	Env:rep	0.271592	0.179404	1.51385	2.90529	0.12684
fufu yield	Geno	0.954114	0.232237	4.10836	10.2064	9e-05
fufu yield	Geno:Env	0.596246	0.189964	3.13873	6.3782	0.0029
fufu yield	Residual	2.93492	0.206488	14.2135	31.3956
fufu yield	Total	9.34819
Fufu%	Env	5.10716	3.00019	1.70228	36.1409	0.09369
Fufu%	Env:rep	0.817065	0.486469	1.67958	5.78198	0.09735
Fufu%	Geno	1.32418	0.356353	3.71591	9.37056	0.0004
Fufu%	Geno:Env	1.22229	0.365152	3.34734	8.64954	0.00147
Fufu%	Residual	5.66055	0.393865	14.3718	40.057
Fufu%	Total	14.1312
gari_yield	Env	4.20523	2.29692	1.83081	48.895	0.07466
gari_yield	Env:rep	0.121587	0.0922495	1.31802	1.41371	0.16737
gari_yield	Geno	0.723025	0.179891	4.01923	8.40675	0.00012
gari_yield	Geno:Env	0.902188	0.172255	5.23752	10.4899	0
gari_yield	Residual	2.6485	0.164578	16.0926	30.7946
gari_yield	Total	8.60053
gari%	Env	6.87653	3.79898	1.8101	45.4766	0.07752
gari%	Env:rep	0.324877	0.223301	1.45488	2.14851	0.13845
gari%	Geno	1.29874	0.33231	3.90822	8.58897	0.00019
gari%	Geno:Env	1.87276	0.322991	5.79816	12.3851	0
gari%	Residual	4.74813	0.29258	16.2285	31.4008
gari%	Total	15.121
Harvest index	Env	0.225685	0.172103	1.31134	16.871	0.168851
Harvest index	Env:rep	0.153587	0.0828788	1.85316	11.4813	0.0716449
Harvest index	Geno	0.103124	0.0327846	3.14551	7.70899	0.00283405
Harvest index	Geno:Env	0.119862	0.0461124	2.59934	8.9602	0.0136063
Harvest index	total	1.33771
Harvest index	units!R	0.735455	0.0515613	14.2637	54.9785	2.64094e-45
Peel loss	Env	18.3711	9.82454	1.86992	54.3339	0.06944
Peel loss	Env:rep	0.168628	0.187263	0.900485	0.498728	0.26597
Peel loss	Geno	3.63525	0.796685	4.56297	10.7515	1e-05
Peel loss	Geno:Env	2.03939	0.542468	3.75946	6.03163	0.00034
Peel loss	Residual	9.59716	0.591122	16.2355	28.3843
Peel loss	Total	33.8115
Root number	Env	681.583	374.365	1.82064	35.0575	0.07605
Root number	Env:rep	28.6369	18.1981	1.57363	1.47295	0.11566
Root number	Geno	265.588	58.0029	4.57887	13.6606	1e-05
Root number	Geno:Env	192.808	35.994	5.35667	9.91716	0
Root number	Residual	775.57	38.0777	20.3681	39.8918
Root number	Total	1944.19
Root size	Env	0.0502453	0.0327277	1.53526	6.10529	0.12277
Root size	Env:rep	0.00923602	0.00798964	1.156	1.12227	0.20452
Root size	Geno	0.0763631	0.0214718	3.55645	9.27886	0.00072
Root size	Geno:Env	0.117041	0.0252512	4.63505	14.2216	1e-05
Root size	Residual	0.570095	0.0281277	20.2681	69.272
Root size	Total	0.82298

## Sheet: S4 ANOVA_FW_AMMI_GGE
Analysis of variance for AMMI, FW, and GGE models
		Sum of Squares
Analysis	traits	Genotype	Environment	Interactions	PC1	PC2	Residuals	Total	% explained by Genotype	% explained by Environment	% explained by Interaction	% explained by Residue
Ammi	Dry matter content	1612***	4691.1***	1958.5	562.1***	417.4***	979	9240.6	17.4448	50.7662	21.1945	10.5946	0.60732
GGE	Dry matter content	na	4691.1***	3570.4	1717 ***	524.8***	1328.6	9590.1	na	48.9161	37.2301	13.8539
FW	Dry matter content	1606.2***	4645.7***	261			1697.1	8210.1	19.5637	56.5852	3.17901	20.6709	1.05659
Ammi	Dry root yield	1271***	6274.9***	2368.2	700.9***	419.6**	1247.7	11161.8	11.3871	56.2176	21.217	11.1783	0.981668
GGE	Dry root yield	na	6274.9***	3639.2	1488.3***	667.6***	1483.3	11397.4	na	55.0555	31.9301	13.0144
FW	Dry root yield	1248.9***	6208.4***	436.7*			1921.8	9815.8	12.7234	63.249	4.44895	19.5786	1.53879
Ammi	Fibre content	150.91***	58.26***	353.97	127.06***	81.52***	145.39	708.53	21.299	8.22266	49.9584	20.5199	0.963422
GGE	Fibre content	na	58.26***	504.88	193.06***	117.8***	194.02	757.16	na	7.69454	66.6808	25.6247
FW	Fibre content	117.78***	41.55***	50.36			274.11	483.81	24.3443	8.58808	10.409	56.6565	2.32731
Ammi	Fresh root yield	11399***	37113***	18097	4475***	3468**	10154	76763	14.8496	48.3475	23.5752	13.2277	0.89078
GGE	Fresh root yield	na	37113***	29496	13012***	4078***	12405	79014	na	46.9702	37.3301	15.6997
FW	fresh root yield	11203***	36841***	2971			15086	66101	16.9483	55.7344	4.49464	22.8227	1.3466
FW	fufu_yield	514.28***	1435.28***	138.29			618.4	2706.26	19.0033	53.0356	5.11	22.8507	1.20246
Ammi	fufu_yield	537.25***	2256.96***	852.11	211.55***	170.15**	470.41	4116.73	13.0504	54.8241	20.6987	11.4268	0.875589
GGE	fufu_yield	na	2256.96***	1389.35	640.2***	210.62***	538.53	4184.84	na	53.9318	33.1996	12.8686
FW	fufu%	776.4***	1822.8***	89.8			1349.9	4038.9	19.2231	45.1311	2.22338	33.4225	1.73867
Ammi	fufu%	849.77***	2511.02***	1569.77	456.12***	366.78***	746.87	5677.43	14.9675	44.2281	27.6493	13.1551	0.878908
GGE	fufu%	na	2511.02***	2419.54	1119.81***	379.96***	919.77	5850.33	na	42.921	41.3573	15.7217
Ammi	gari_yield	555.16***	2088.74***	1081.22	322.01***	194.84**	564.37	4289.49	12.9423	48.6944	25.2063	13.157	1.01659
GGE	gari_yield	na	2088.74***	1636.38	657.16***	311.91***	667.31	4392.43	na	47.5532	37.2545	15.1923
FW	gari_yield	566.2***	2015.1***	160.1			915.6	3657	15.4826	55.1025	4.37791	25.0369	1.6171
Ammi	gari%	1031.2***	4114.7***	1520.3	387.3***	297.4**	835.6	7501.8	13.746	54.8495	20.2658	11.1387	0.810318
FW	gari%	990.6***	4061.5***	185.5			1333.4	6570.9	15.0756	61.8104	2.82305	20.2925	1.34605
GGE	gari%	na	4114.7***	2551.4	1165.1***	303.8**	1082.5	7748.6	na	53.1025	32.9272	13.9703
Ammi	Harvest index	1.38***	2.21***	1.62	0.59***	0.38***	0.64935	5.85935	23.5521	37.7175	27.6481	11.0823	0.470543
GGE	Harvest index	na	2.21***	3	1.55***	0.49***	0.96442	6.17442	na	35.7928	48.5876	15.6196
FW	Harvest index	1.3809***	2.2032***	0.2798			1.3401	5.204	26.5354	42.3367	5.37663	25.7513	0.970454
Ammi	Peel loss	2460.1***	8040.9***	3305.8	926.3***	843.3***	1536.2	15343	16.034	52.4076	21.546	10.0124	0.624446
GGE	Peel loss	na	8040.9***	5765.9	2638.5***	901***	2226.4	16033.2	na	50.1516	35.9623	13.8862
FW	Peel_loss	2436.1***	8015.1***	501.6			2791.9	13744.7	17.7239	58.3141	3.64941	20.3126	1.14605
Ammi	Root number	173587***	336944***	230174	68568***	45890***	115716	856421	20.2689	39.3433	26.8763	13.5116	0.666617
GGE	Root number	na	336944***	403761	182721***	65710***	155331	896036	na	37.6038	45.0608	17.3354
Ammi	Root size	70.52***	20.15***	174.24	55.35***	33.26***	85.631	350.541	20.1175	5.74826	49.706	24.4282	1.21428
GGE	Root size	na	20.15***	244.77	92.14***	43.26***	109.37	374.29	na	5.38353	65.3958	29.2207
FW	Root_number	172927***	336880***	22372			207717	739895	23.3718	45.5308	3.02367	28.0738	1.20118
FW	Root_size	70.566***	20.002***	47.418***			126.72	264.706	26.6583	7.55631	17.9135	47.872	1.79577

## Sheet: S5 FW MSDeviation  sensitivity
	S3 FW MSDeviation sensitivity
trait	Min_MSdeviation	Max_Msdeviation	Median_Msdeviation	Variance_Msdeviation	Min_sensitivity	Max_sensitivity	Median_sensitivity	Variance_sensitivity
gari%	0.0293493	0.861369	0.242088	0.0261958	0.510138	1.49495	1.0147	0.0459731
Dry matter content	0.0318034	1.61344	0.231277	0.0536928	0.315418	1.70402	1.00011	0.0573506
Peel loss	0.011641	0.866178	0.210799	0.0384129	0.334072	1.77564	0.996469	0.0640177
Root number	0.0253269	1.29625	0.343501	0.0698934	0.287993	1.70767	0.96672	0.0673548
Dry root yield	0.0393487	0.85982	0.223232	0.0298404	0.382202	1.7156	1.02448	0.0723918
Fresh root yield	0.0423493	1.14867	0.259047	0.0416294	0.368707	1.7322	1.00143	0.0816213
gari_yield	0.0542374	1.17993	0.264075	0.0498164	0.413686	1.96353	1.05237	0.0919271
fufu_yield	0.0333677	0.641021	0.216972	0.0241223	-0.145988	1.72309	1.02532	0.128561
Harvest index	0.0307684	1.64553	0.246174	0.0679877	0.245159	2.07865	0.970368	0.143229
fufu%	0.0147972	1.24521	0.22188	0.0908192	-0.0275533	1.80898	1.06424	0.16786
Root size	0.010876	2.06249	0.45088	0.204826	-3.83602	4.03728	1.2639	3.22803
Fibre content	0.0188913	5.74087	0.439944	0.649211	-9.70092	15.6142	0.95043	23.1446

## Sheet: S6 FW Genotype ranking base
		S2 Finley- Wilkerson Genotype ranking base
trait	genotype	sens	rank	se_sens	genMean	se_genMean	MSdeviation
Dry matter content	G9	1.70402	1	0.245336	-0.00101137	0.185441	0.297335
Dry matter content	G2	1.47149	2	0.245336	0.514865	0.185441	0.234809
Dry matter content	G7	1.45724	3	0.245336	0.102305	0.185441	0.315432
Dry matter content	G55	1.34762	4	0.245336	0.313343	0.185441	0.710396
Dry matter content	G50	1.3177	5	0.245336	0.335336	0.185441	0.0348301
Dry matter content	G37	1.31554	6	0.476725	0.315143	0.224176	0.305665
Dry matter content	G46	1.30628	7	0.245336	-0.100592	0.185441	0.55331
Dry matter content	G52	1.29079	8	0.245336	-0.222659	0.185441	0.215368
Dry matter content	G11	1.27713	9	0.245336	-0.361232	0.185441	0.321508
Dry matter content	G60	1.25302	10	0.245336	-0.254801	0.185441	0.0318034
Dry matter content	G59	1.20814	11	0.245336	-0.293285	0.185441	0.294297
Dry matter content	G45	1.20623	12	0.245336	0.792817	0.185441	0.128336
Dry matter content	TMS982101	1.20136	13	0.245336	-0.74718	0.185441	0.0815147
Dry matter content	G6	1.20008	14	0.245336	0.106892	0.185441	0.224357
Dry matter content	G4	1.18579	15	0.245336	0.80725	0.185441	0.312048
Dry matter content	G48	1.18459	16	0.245336	0.248773	0.185441	0.622587
Dry matter content	G62	1.16229	17	0.245336	-0.409198	0.185441	0.231277
Dry matter content	G16	1.1597	18	0.245336	-0.147109	0.185441	0.238188
Dry matter content	G17	1.14915	19	0.245336	-0.71472	0.185441	0.156178
Dry matter content	G26	1.14264	20	0.245336	-1.13374	0.185441	0.471994
Dry matter content	G49	1.13661	21	0.245336	0.25021	0.185441	0.123117
Dry matter content	G56	1.13437	22	0.245336	0.768742	0.185441	0.174998
Dry matter content	G51	1.11751	23	0.245336	-0.102653	0.185441	0.361893
Dry matter content	G1	1.11297	24	0.245336	-0.506003	0.185441	0.0623581
Dry matter content	G61	1.05518	25	0.245336	0.510016	0.185441	0.0458129
Dry matter content	G44	1.05313	26	0.245336	0.639498	0.185441	0.284942
Dry matter content	G27	1.05129	27	0.245336	-0.986926	0.185441	0.511745
Dry matter content	G24	1.04495	28	0.245336	0.659863	0.185441	0.281443
Dry matter content	TMEB419	1.04107	29	0.245336	0.283176	0.185441	0.0733991
Dry matter content	G18	1.04033	30	0.245336	0.217039	0.185441	0.254946
Dry matter content	G5	1.02542	31	0.245336	-1.00262	0.185441	0.511448
Dry matter content	TMS30572	1.01351	32	0.245336	-0.392446	0.185441	0.0546623
Dry matter content	G54	1.00759	33	0.245336	0.171518	0.185441	0.273957
Dry matter content	G47	1.00011	34	0.245336	-0.293421	0.185441	0.15511
Dry matter content	G10	0.976276	35	0.245336	0.271619	0.185441	0.109688
Dry matter content	G42	0.97348	36	0.245336	0.404944	0.185441	0.150507
Dry matter content	G23	0.971364	37	0.245336	0.414966	0.185441	0.0569527
Dry matter content	G13	0.96051	38	0.245336	-0.802889	0.185441	0.442134
Dry matter content	G25	0.956338	39	0.245336	-0.118508	0.185441	0.817356
Dry matter content	G58	0.947841	40	0.245336	-0.642002	0.185441	0.130138
Dry matter content	TMS980581	0.93065	41	0.245336	-0.381081	0.185441	0.18223
Dry matter content	G15	0.925929	42	0.245336	0.110642	0.185441	0.357737
Dry matter content	G20	0.911159	43	0.245336	-0.378626	0.185441	0.324707
Dry matter content	G36	0.898721	44	0.245336	-0.307471	0.185441	0.056083
Dry matter content	G35	0.895354	45	0.245336	0.130128	0.185441	0.252489
Dry matter content	G53	0.89226	46	0.245336	0.279236	0.185441	0.0937363
Dry matter content	G33	0.889358	47	0.245336	0.475642	0.185441	0.109983
Dry matter content	G39	0.864336	48	0.245336	-0.0434381	0.185441	0.143801
Dry matter content	G8	0.860051	49	0.245336	-0.265707	0.185441	0.182566
Dry matter content	G43	0.816359	50	0.245336	0.475057	0.185441	0.18612
Dry matter content	G12	0.810569	51	0.245336	0.218269	0.185441	0.190169
Dry matter content	G30	0.808513	52	0.245336	-0.174097	0.185441	0.267665
Dry matter content	G3	0.807422	53	0.245336	0.295187	0.185441	0.499442
Dry matter content	G22	0.806845	54	0.245336	-0.09808	0.185441	0.28903
Dry matter content	G34	0.775409	55	0.245336	-0.155228	0.185441	0.165398
Dry matter content	G29	0.746535	56	0.245336	-0.0396527	0.185441	0.201397
Dry matter content	TMS000070	0.745939	57	0.245336	-0.363063	0.185441	0.258777
Dry matter content	G28	0.73794	58	0.245336	-0.0918561	0.185441	0.272997
Dry matter content	G57	0.726073	59	0.245336	-0.124975	0.185441	0.192981
Dry matter content	G14	0.725829	60	0.245336	-0.0762243	0.185441	0.149802
Dry matter content	G41	0.724716	61	0.245336	-0.0699673	0.185441	0.175178
Dry matter content	G38	0.674811	62	0.245336	-0.0640942	0.185441	0.431968
Dry matter content	G40	0.672861	63	0.245336	0.49781	0.185441	0.170006
Dry matter content	G21	0.650764	64	0.245336	0.755133	0.185441	0.081071
Dry matter content	G19	0.620688	65	0.245336	0.402298	0.185441	0.384183
Dry matter content	G32	0.604849	66	0.245336	0.142144	0.185441	0.449716
Dry matter content	G31	0.315418	67	0.245336	0.172986	0.185441	1.61344
Dry root yield	G35	1.7156	1	0.226825	0.159615	0.180585	0.381736
Dry root yield	G37	1.50185	2	0.283864	-0.131171	0.209707	0.195832
Dry root yield	G62	1.44171	3	0.226825	-0.164835	0.180585	0.346486
Dry root yield	G45	1.42646	4	0.226825	0.0607963	0.180585	0.239392
Dry root yield	G6	1.39904	5	0.231247	0.667437	0.193528	0.158598
Dry root yield	G34	1.38441	6	0.226825	0.226776	0.180585	0.567937
Dry root yield	G20	1.32699	7	0.226825	0.277105	0.180585	0.132737
Dry root yield	G17	1.28552	8	0.226825	0.394412	0.180585	0.386893
Dry root yield	G59	1.23615	9	0.226825	0.502567	0.180585	0.274854
Dry root yield	G27	1.23512	10	0.226825	0.00794781	0.180585	0.163321
Dry root yield	G8	1.21224	11	0.226825	0.215801	0.180585	0.337076
Dry root yield	G53	1.20781	12	0.226825	0.408698	0.180585	0.204685
Dry root yield	G52	1.19923	13	0.226825	0.480039	0.180585	0.0735395
Dry root yield	G19	1.18588	14	0.226825	0.497722	0.180585	0.0990947
Dry root yield	G1	1.18129	15	0.226825	0.0785581	0.180585	0.15073
Dry root yield	G50	1.1781	16	0.226825	0.377344	0.180585	0.368207
Dry root yield	G56	1.17335	17	0.226825	0.407738	0.180585	0.128116
Dry root yield	G58	1.17114	18	0.226825	-0.126903	0.180585	0.204446
Dry root yield	G4	1.15961	19	0.226825	-0.0738441	0.180585	0.126507
Dry root yield	G47	1.15178	20	0.226825	0.0209778	0.180585	0.105252
Dry root yield	G28	1.14982	21	0.226825	0.086559	0.180585	0.413782
Dry root yield	TMS000070	1.14704	22	0.226825	0.464919	0.180585	0.122921
Dry root yield	G33	1.14697	23	0.226825	-0.251558	0.180585	0.0497596
Dry root yield	G13	1.14273	24	0.226825	0.226123	0.180585	0.114993
Dry root yield	G23	1.13105	25	0.226825	1.03338	0.180585	0.223232
Dry root yield	G18	1.12895	26	0.226825	-0.301319	0.180585	0.373559
Dry root yield	G36	1.12502	27	0.226825	0.101278	0.180585	0.0816735
Dry root yield	G7	1.12252	28	0.226825	-0.00578403	0.180585	0.243395
Dry root yield	G21	1.08041	29	0.226825	0.578424	0.180585	0.200053
Dry root yield	G40	1.0532	30	0.226825	0.434696	0.180585	0.5282
Dry root yield	G14	1.05204	31	0.226825	0.0664803	0.180585	0.240476
Dry root yield	G41	1.04349	32	0.226825	0.360698	0.180585	0.453931
Dry root yield	G16	1.0397	33	0.226825	-0.0734387	0.180585	0.244233
Dry root yield	G25	1.02448	34	0.226825	0.0462459	0.180585	0.858144
Dry root yield	G42	1.01932	35	0.226825	0.33858	0.180585	0.288805
Dry root yield	G55	1.00983	36	0.226825	-0.123385	0.180585	0.08089
Dry root yield	G2	0.99896	37	0.226825	-0.169852	0.180585	0.295127
Dry root yield	G60	0.992508	38	0.226825	-0.258774	0.180585	0.168745
Dry root yield	G12	0.97649	39	0.226825	0.314177	0.180585	0.113004
Dry root yield	G57	0.955659	40	0.226825	0.0864665	0.180585	0.334522
Dry root yield	G29	0.946035	41	0.226825	-0.308615	0.180585	0.288648
Dry root yield	G49	0.937701	42	0.226825	0.0707526	0.180585	0.181087
Dry root yield	G22	0.932629	43	0.226825	0.0312102	0.180585	0.269111
Dry root yield	G32	0.90096	44	0.226825	-0.177488	0.180585	0.434446
Dry root yield	TMS30572	0.899013	45	0.226825	-0.620562	0.180585	0.0393487
Dry root yield	G44	0.898586	46	0.226825	-0.166641	0.180585	0.85982
Dry root yield	G39	0.897331	47	0.226825	-0.203041	0.180585	0.24306
Dry root yield	G38	0.856003	48	0.226825	0.334665	0.180585	0.0715234
Dry root yield	G51	0.855569	49	0.226825	-0.102678	0.180585	0.295306
Dry root yield	G61	0.838066	50	0.226825	-0.238609	0.180585	0.0973605
Dry root yield	G24	0.797238	51	0.226825	-0.499925	0.180585	0.0811959
Dry root yield	G11	0.796686	52	0.226825	-0.425924	0.180585	0.273218
Dry root yield	TMS982101	0.779912	53	0.226825	-0.327472	0.180585	0.18822
Dry root yield	G43	0.760926	54	0.226825	-0.874329	0.180585	0.155579
Dry root yield	G9	0.730728	55	0.226825	-0.486875	0.180585	0.152749
Dry root yield	G3	0.723572	56	0.226825	-0.315879	0.180585	0.161794
Dry root yield	G54	0.716979	57	0.226825	0.13325	0.180585	0.0490419
Dry root yield	G30	0.700818	58	0.226825	0.0237027	0.180585	0.439389
Dry root yield	G26	0.698976	59	0.226825	-0.985903	0.180585	0.217455
Dry root yield	G5	0.671244	60	0.226825	-0.0765029	0.180585	0.354207
Dry root yield	G46	0.662788	61	0.226825	-0.4519	0.180585	0.430139
Dry root yield	G15	0.600154	62	0.226825	-0.398922	0.180585	0.234523
Dry root yield	G10	0.577161	63	0.226825	-0.2803	0.180585	0.457639
Dry root yield	G31	0.475787	64	0.226825	-0.0269064	0.180585	0.337971
Dry root yield	TMS980581	0.459114	65	0.226825	-0.204461	0.180585	0.122115
Dry root yield	G48	0.390357	66	0.226825	-0.237727	0.180585	0.705876
Dry root yield	TMEB419	0.382202	67	0.226825	-0.212849	0.180585	0.13337
fufu_yield	G56	1.72309	1	0.267942	0.527941	0.202658	0.417936
fufu_yield	G62	1.65141	2	0.420144	-0.19352	0.259609	0.291907
fufu_yield	G6	1.59097	3	0.427252	0.497772	0.28717	0.0948854
fufu_yield	G1	1.56703	4	0.267942	0.11945	0.202658	0.147285
fufu_yield	G14	1.48892	5	0.420144	0.297172	0.259609	0.0333677
fufu_yield	G28	1.46095	6	0.267942	0.128489	0.202658	0.216972
fufu_yield	G35	1.45383	7	0.318011	0.235159	0.222115	0.360005
fufu_yield	G59	1.42306	8	0.420144	0.584095	0.259609	0.194613
fufu_yield	G44	1.3989	9	0.32213	0.261435	0.2226	0.208096
fufu_yield	G17	1.39713	10	0.267942	0.148763	0.202658	0.332389
fufu_yield	TMS000070	1.39182	11	0.267942	0.357766	0.202658	0.265326
fufu_yield	G13	1.36467	12	0.267942	0.274946	0.202658	0.186941
fufu_yield	G53	1.34945	13	0.420144	0.832705	0.259609	0.0498879
fufu_yield	G20	1.30929	14	0.267942	-0.110829	0.202658	0.145535
fufu_yield	G23	1.3063	15	0.267942	0.939554	0.202658	0.341545
fufu_yield	G4	1.29235	16	0.420144	-0.316828	0.259609	0.0795658
fufu_yield	G45	1.23944	17	0.420144	0.437048	0.259609	0.0422606
fufu_yield	G21	1.23873	18	0.267942	0.506428	0.202658	0.0909066
fufu_yield	G12	1.20029	19	0.267942	0.236975	0.202658	0.100717
fufu_yield	G33	1.19801	20	0.318011	-0.324566	0.222115	0.118053
fufu_yield	G52	1.18158	21	0.420144	0.667177	0.259609	0.180765
fufu_yield	G16	1.17117	22	0.420144	-0.319903	0.259609	0.296396
fufu_yield	G22	1.16159	23	0.267942	0.0907399	0.202658	0.641021
fufu_yield	G55	1.12971	24	0.420144	-0.074158	0.259609	0.0792909
fufu_yield	G61	1.11593	25	0.267942	-0.48905	0.202658	0.265731
fufu_yield	G50	1.09382	26	0.420144	0.726027	0.259609	0.4692
fufu_yield	G37	1.09333	27	0.589376	-0.183222	0.281507	0.432601
fufu_yield	G41	1.07041	28	0.267942	0.325741	0.202658	0.525865
fufu_yield	G27	1.05889	29	0.420144	0.0778574	0.259609	0.12887
fufu_yield	G40	1.05591	30	0.420144	0.452892	0.259609	0.33017
fufu_yield	TMS30572	1.05003	31	0.318011	-0.80897	0.222115	0.145482
fufu_yield	G36	1.03419	32	0.318011	0.0982583	0.222115	0.0373458
fufu_yield	G58	1.02977	33	0.318011	-0.0755356	0.222115	0.180811
fufu_yield	G60	1.02532	34	0.267942	-0.425826	0.202658	0.367975
fufu_yield	G57	1.02383	35	0.267942	0.0228061	0.202658	0.242638
fufu_yield	G32	1.02209	36	0.420144	-0.223795	0.259609	0.476228
fufu_yield	G51	0.997747	37	0.267942	-0.231076	0.202658	0.271954
fufu_yield	G18	0.992503	38	0.420144	-0.691827	0.259609	0.0580152
fufu_yield	G3	0.982467	39	0.267942	-0.52692	0.202658	0.220651
fufu_yield	TMS982101	0.961517	40	0.267942	-0.426177	0.202658	0.0983582
fufu_yield	G54	0.946716	41	0.267942	-0.135033	0.202658	0.178986
fufu_yield	G38	0.909675	42	0.267942	0.158191	0.202658	0.138432
fufu_yield	G24	0.903077	43	0.267942	-0.463898	0.202658	0.0699069
fufu_yield	G11	0.896631	44	0.267942	-0.517325	0.202658	0.609895
fufu_yield	G5	0.873873	45	0.267942	-0.121422	0.202658	0.340082
fufu_yield	G31	0.871559	46	0.267942	-0.168243	0.202658	0.284632
fufu_yield	G8	0.85517	47	0.420144	0.0724505	0.259609	0.339107
fufu_yield	G10	0.827819	48	0.267942	-0.346366	0.202658	0.48224
fufu_yield	G48	0.823946	49	0.267942	-0.30576	0.202658	0.636385
fufu_yield	G7	0.793905	50	0.420144	0.278235	0.259609	0.408713
fufu_yield	G47	0.780578	51	0.420144	0.288155	0.259609	0.107695
fufu_yield	G29	0.737057	52	0.420144	-0.543282	0.259609	0.366209
fufu_yield	G19	0.729768	53	0.420144	0.489731	0.259609	0.117815
fufu_yield	G39	0.681563	54	0.420144	-0.41453	0.259609	0.346324
fufu_yield	G43	0.662882	55	0.420144	-1.19911	0.259609	0.0597309
fufu_yield	G2	0.652967	56	0.420144	-0.16768	0.259609	0.117221
fufu_yield	TMS980581	0.649245	57	0.267942	-0.393208	0.202658	0.372184
fufu_yield	G9	0.645978	58	0.420144	-0.346162	0.259609	0.22007
fufu_yield	G26	0.637944	59	0.318011	-1.16533	0.222115	0.197118
fufu_yield	G34	0.594322	60	0.420144	0.337321	0.259609	0.533471
fufu_yield	TMEB419	0.517746	61	0.267942	-0.191257	0.202658	0.261316
fufu_yield	G46	0.479983	62	0.420144	-0.873654	0.259609	0.265983
fufu_yield	G42	0.400083	63	0.420144	0.374291	0.259609	0.116904
fufu_yield	G49	0.372632	64	0.420144	-0.0957131	0.259609	0.0412772
fufu_yield	G30	0.36046	65	0.420144	-0.0415065	0.259609	0.249104
fufu_yield	G15	0.242949	66	0.420144	-0.308012	0.259609	0.193639
fufu_yield	G25	-0.145988	67	0.420144	-0.108954	0.259609	0.0966235
Fibre content	G23	15.6142	1	2.80733	0.576946	0.306881	1.51786
Fibre content	G38	12.6313	2	2.80733	0.610264	0.306881	2.0483
Fibre content	G36	11.4892	3	3.92222	0.371847	0.347041	0.374998
Fibre content	G48	9.97353	4	2.80733	0.395147	0.306881	0.715484
Fibre content	G26	9.93234	5	3.92222	0.151546	0.347041	1.40179
Fibre content	G31	8.53114	6	2.80733	0.0480169	0.306881	0.526055
Fibre content	G10	7.00755	7	2.80733	-0.0165243	0.306881	0.631942
Fibre content	G54	6.63705	8	2.80733	0.583735	0.306881	0.422983
Fibre content	G33	6.00942	9	3.92222	0.541071	0.347041	0.953964
Fibre content	G5	4.69153	10	2.80733	-0.115293	0.306881	0.753285
Fibre content	G61	4.56191	11	2.80733	0.0710443	0.306881	0.925164
Fibre content	G41	4.22824	12	2.80733	0.928057	0.306881	0.647271
Fibre content	G15	4.13959	13	4.18744	-0.691832	0.393416	0.446276
Fibre content	TMS982101	4.01048	14	2.80733	-0.182399	0.306881	0.470024
Fibre content	G37	3.62076	15	5.70677	0.562946	0.397629	0.0188913
Fibre content	G35	3.18907	16	3.92222	0.311094	0.347041	0.964431
Fibre content	G3	3.0598	17	2.80733	-0.131034	0.306881	0.398833
Fibre content	G58	3.01118	18	3.92222	-0.568709	0.347041	0.54586
Fibre content	G9	2.90633	19	4.20339	-0.170132	0.43018	0.0472602
Fibre content	G57	2.63114	20	2.80733	-0.0219264	0.306881	0.494438
Fibre content	G13	2.54924	21	2.80733	-0.424655	0.306881	0.140671
Fibre content	G18	2.53181	22	4.18744	-0.625835	0.393416	0.103604
Fibre content	G59	2.48558	23	4.18744	-0.634753	0.393416	0.523785
Fibre content	G4	2.39854	24	4.18744	0.104854	0.393416	0.230309
Fibre content	G22	2.37173	25	3.92222	-0.168009	0.347041	0.1481
Fibre content	G17	2.31431	26	2.80733	-0.226879	0.306881	0.55066
Fibre content	G24	2.24535	27	2.80733	-0.221448	0.306881	0.270424
Fibre content	G21	2.18155	28	2.80733	-0.318439	0.306881	0.260382
Fibre content	G50	2.08751	29	4.18744	-0.866438	0.393416	0.0873079
Fibre content	G62	1.96398	30	4.18744	-0.268017	0.393416	0.103524
Fibre content	G42	1.91215	31	4.18744	-0.506401	0.393416	0.515789
Fibre content	G53	1.68788	32	4.18744	-0.691602	0.393416	0.055336
Fibre content	TMS000070	1.02117	33	2.80733	0.0962831	0.306881	0.461001
Fibre content	G51	0.95043	34	2.80733	-0.26896	0.306881	0.495618
Fibre content	G32	0.689299	35	4.18744	-0.203616	0.393416	0.272973
Fibre content	TMEB419	0.457982	36	2.80733	-0.00844062	0.306881	0.199318
Fibre content	G25	0.31492	37	4.18744	-0.0071448	0.393416	0.484752
Fibre content	G60	0.290884	38	2.80733	0.219639	0.306881	0.955034
Fibre content	G34	0.246402	39	4.18744	0.064837	0.393416	0.242427
Fibre content	G52	0.0678117	40	4.18744	-0.208515	0.393416	0.0842043
Fibre content	G56	-0.151735	41	2.80733	-0.963164	0.306881	0.276073
Fibre content	G47	-0.392257	42	4.18744	-0.667931	0.393416	0.203687
Fibre content	G30	-0.497558	43	4.18744	0.584891	0.393416	0.229155
Fibre content	TMS980581	-0.590419	44	2.80733	-0.593039	0.306881	0.223979
Fibre content	G27	-0.811948	45	4.18744	-0.328543	0.393416	0.368062
Fibre content	G44	-1.09394	46	2.83874	-0.590622	0.328531	0.0645014
Fibre content	TMS30572	-1.25298	47	3.92222	-0.210226	0.347041	0.448591
Fibre content	G6	-1.50898	48	4.18744	-0.427322	0.393416	0.361876
Fibre content	G43	-2.24111	49	4.18744	-0.554216	0.393416	0.141657
Fibre content	G46	-2.33056	50	4.18744	0.250721	0.393416	0.439944
Fibre content	G20	-2.64998	51	2.80733	0.77995	0.306881	1.61872
Fibre content	G1	-2.80428	52	2.80733	-0.00805822	0.306881	1.50448
Fibre content	G39	-2.9236	53	4.18744	0.423307	0.393416	0.133786
Fibre content	G14	-2.99167	54	4.18744	-0.541701	0.393416	0.142078
Fibre content	G16	-3.10193	55	4.18744	-0.631524	0.393416	0.437944
Fibre content	G7	-3.17234	56	4.18744	-0.342275	0.393416	0.290031
Fibre content	G55	-3.29962	57	4.18744	-0.347222	0.393416	0.28886
Fibre content	G45	-4.24797	58	4.18744	0.0045111	0.393416	0.47942
Fibre content	G40	-4.45129	59	4.20339	0.390466	0.43018	0.0847007
Fibre content	G49	-4.53551	60	4.18744	0.371467	0.393416	0.749309
Fibre content	G8	-4.89475	61	4.18744	1.29397	0.393416	0.79997
Fibre content	G28	-5.00249	62	2.80733	0.650883	0.306881	1.87103
Fibre content	G19	-5.2693	63	4.18744	-0.189474	0.393416	0.481469
Fibre content	G29	-6.2879	64	4.18744	0.654516	0.393416	0.170594
Fibre content	G11	-7.57744	65	2.80733	1.14636	0.306881	5.74087
Fibre content	G12	-7.86184	66	2.80733	0.740325	0.306881	2.5301
Fibre content	G2	-9.70092	67	4.18744	0.410883	0.393416	0.489602
fufu%	G48	1.80898	1	0.363083	0.153108	0.233475	0.328357
fufu%	G56	1.80165	2	0.363083	0.910235	0.233475	0.877422
fufu%	G15	1.73383	3	0.498992	0.380897	0.297956	0.0655281
fufu%	G11	1.68185	4	0.363083	-0.411946	0.233475	0.595612
fufu%	G31	1.51008	5	0.363083	-0.133022	0.233475	0.919792
fufu%	G51	1.46919	6	0.363083	-0.125807	0.233475	0.247126
fufu%	G40	1.46835	7	0.498992	0.589469	0.297956	0.121102
fufu%	G3	1.46493	8	0.363083	-0.0492862	0.233475	0.556688
fufu%	G55	1.43401	9	0.498992	0.642603	0.297956	0.194116
fufu%	G24	1.42093	10	0.363083	0.838351	0.233475	0.508277
fufu%	G10	1.38264	11	0.363083	0.218577	0.233475	0.152745
fufu%	TMS982101	1.37567	12	0.363083	-0.27417	0.233475	1.24521
fufu%	G53	1.36613	13	0.498992	0.770572	0.297956	0.034784
fufu%	G16	1.36133	14	0.498992	0.104633	0.297956	0.0229274
fufu%	G62	1.35773	15	0.498992	0.137012	0.297956	0.0724272
fufu%	TMS30572	1.34554	16	0.382794	-0.334073	0.251329	0.486936
fufu%	G17	1.30878	17	0.363083	-0.747691	0.233475	0.193307
fufu%	G28	1.30795	18	0.363083	-0.00578698	0.233475	0.230122
fufu%	G18	1.27299	19	0.498992	0.367024	0.297956	0.0312705
fufu%	G54	1.25803	20	0.363083	-0.293636	0.233475	0.718467
fufu%	G59	1.24984	21	0.498992	-0.0930135	0.297956	0.43068
fufu%	G12	1.24834	22	0.363083	0.290426	0.233475	0.192212
fufu%	G1	1.2461	23	0.363083	-0.199974	0.233475	0.0852494
fufu%	TMS980581	1.16431	24	0.363083	-0.336983	0.233475	0.704635
fufu%	G60	1.1387	25	0.363083	-0.396273	0.233475	0.826496
fufu%	G47	1.11978	26	0.498992	0.147417	0.297956	0.198646
fufu%	G27	1.11625	27	0.498992	-0.614201	0.297956	0.20721
fufu%	G5	1.11013	28	0.363083	-0.620818	0.233475	0.930928
fufu%	G26	1.09709	29	0.382794	-1.14789	0.251329	1.12242
fufu%	G33	1.08373	30	0.382794	0.201707	0.251329	0.40736
fufu%	G43	1.08062	31	0.498992	0.189667	0.297956	0.0935503
fufu%	G29	1.06747	32	0.498992	-0.602133	0.297956	0.225926
fufu%	G23	1.06734	33	0.363083	0.307634	0.233475	0.28606
fufu%	G13	1.06424	34	0.363083	-0.36047	0.233475	0.786551
fufu%	G36	1.05035	35	0.382794	-0.366715	0.251329	0.212423
fufu%	TMEB419	1.0471	36	0.363083	0.375019	0.233475	0.0374218
fufu%	G7	1.01371	37	0.498992	0.676326	0.297956	0.204279
fufu%	G50	1.01269	38	0.498992	0.73585	0.297956	0.0521292
fufu%	G61	0.990293	39	0.363083	-0.0930885	0.233475	0.273953
fufu%	TMS000070	0.976266	40	0.363083	-0.154902	0.233475	0.1011
fufu%	G20	0.927998	41	0.363083	-0.731734	0.233475	0.239189
fufu%	G44	0.924658	42	0.47564	0.960668	0.260527	0.216781
fufu%	G8	0.909718	43	0.498992	-0.283505	0.297956	0.054107
fufu%	G6	0.889501	44	0.498992	-0.157408	0.297956	0.394276
fufu%	G41	0.85259	45	0.363083	0.0588478	0.233475	0.332433
fufu%	G57	0.786302	46	0.363083	-0.0422167	0.233475	0.169905
fufu%	G37	0.776535	47	0.826409	-0.244264	0.30662	0.105978
fufu%	G52	0.772853	48	0.498992	-0.216377	0.297956	0.0273156
fufu%	G21	0.759481	49	0.363083	0.835394	0.233475	1.07804
fufu%	G14	0.748645	50	0.498992	0.252347	0.297956	0.0457921
fufu%	G38	0.72841	51	0.363083	-0.0765921	0.233475	0.30392
fufu%	G58	0.718139	52	0.382794	-0.395164	0.251329	0.205874
fufu%	G34	0.696512	53	0.498992	0.110757	0.297956	0.0229369
fufu%	G22	0.650426	54	0.363083	0.111579	0.233475	0.73351
fufu%	G49	0.547544	55	0.498992	-0.113738	0.297956	0.0147972
fufu%	G2	0.545165	56	0.498992	0.536923	0.297956	0.472983
fufu%	G9	0.541955	57	0.498992	0.781446	0.297956	0.22188
fufu%	G45	0.505563	58	0.498992	0.98186	0.297956	0.126896
fufu%	G46	0.4466	59	0.498992	0.176148	0.297956	0.242279
fufu%	G30	0.432808	60	0.498992	-0.728551	0.297956	0.127372
fufu%	G4	0.393811	61	0.498992	0.194872	0.297956	0.096657
fufu%	G42	0.356838	62	0.498992	0.177687	0.297956	0.0208746
fufu%	G25	0.315474	63	0.498992	-0.168879	0.297956	0.236618
fufu%	G39	0.307699	64	0.498992	-0.132551	0.297956	0.313564
fufu%	G32	0.235049	65	0.498992	-0.162325	0.297956	0.614191
fufu%	G35	0.182324	66	0.382794	0.200812	0.251329	0.240062
fufu%	G19	-0.0275533	67	0.498992	-0.0285425	0.297956	0.0919602
Fresh root yield	G35	1.7322	1	0.261771	0.0537591	0.195011	0.360459
Fresh root yield	G62	1.49735	2	0.261771	-0.0683007	0.195011	0.523613
Fresh root yield	G45	1.43215	3	0.261771	-0.18656	0.195011	0.19722
Fresh root yield	G28	1.42906	4	0.261771	0.128003	0.195011	0.335944
Fresh root yield	G58	1.40115	5	0.261771	0.0803038	0.195011	0.189582
Fresh root yield	G27	1.397	6	0.261771	0.374896	0.195011	0.349925
Fresh root yield	G6	1.36116	7	0.278888	0.673127	0.210228	0.180243
Fresh root yield	G37	1.32386	8	0.289188	-0.27145	0.22518	0.379968
Fresh root yield	G13	1.31187	9	0.261771	0.594147	0.195011	0.0786499
Fresh root yield	G47	1.28177	10	0.261771	0.141171	0.195011	0.225143
Fresh root yield	G59	1.27642	11	0.261771	0.711617	0.195011	0.291334
Fresh root yield	G20	1.27286	12	0.261771	0.433618	0.195011	0.236491
Fresh root yield	G34	1.26894	13	0.261771	0.301555	0.195011	0.879545
Fresh root yield	G41	1.25749	14	0.261771	0.439461	0.195011	0.351401
Fresh root yield	G36	1.24717	15	0.261771	0.229527	0.195011	0.136662
Fresh root yield	G19	1.23572	16	0.261771	0.414888	0.195011	0.0719703
Fresh root yield	G14	1.22535	17	0.261771	0.0830755	0.195011	0.270954
Fresh root yield	TMS000070	1.21507	18	0.261771	0.671527	0.195011	0.114323
Fresh root yield	G53	1.21047	19	0.261771	0.32959	0.195011	0.227223
Fresh root yield	G33	1.19062	20	0.261771	-0.407703	0.195011	0.048367
Fresh root yield	G52	1.17005	21	0.261771	0.653293	0.195011	0.116553
Fresh root yield	G50	1.15018	22	0.261771	0.302133	0.195011	0.478316
Fresh root yield	G23	1.11344	23	0.261771	0.934064	0.195011	0.259047
Fresh root yield	G8	1.10583	24	0.261771	0.291212	0.195011	0.565675
Fresh root yield	G4	1.0951	25	0.261771	-0.379226	0.195011	0.207414
Fresh root yield	G22	1.07947	26	0.261771	0.0916026	0.195011	0.506131
Fresh root yield	G17	1.07232	27	0.261771	0.769793	0.195011	0.648746
Fresh root yield	G1	1.06511	28	0.261771	0.28068	0.195011	0.267685
Fresh root yield	G21	1.05839	29	0.261771	0.359285	0.195011	0.317182
Fresh root yield	G40	1.05459	30	0.261771	0.298381	0.195011	0.409077
Fresh root yield	G32	1.04636	31	0.261771	-0.278014	0.195011	0.317456
Fresh root yield	G16	1.02383	32	0.261771	-0.0491876	0.195011	0.207459
Fresh root yield	G56	1.00812	33	0.261771	0.166522	0.195011	0.0736267
Fresh root yield	G38	1.00143	34	0.261771	0.4276	0.195011	0.0936012
Fresh root yield	G60	0.993335	35	0.261771	-0.248658	0.195011	0.22062
Fresh root yield	G12	0.985912	36	0.261771	0.296731	0.195011	0.123442
Fresh root yield	G7	0.985766	37	0.261771	-0.0447009	0.195011	0.23733
Fresh root yield	G57	0.98226	38	0.261771	0.211674	0.195011	0.47501
Fresh root yield	TMS30572	0.945302	39	0.261771	-0.614591	0.195011	0.0762234
Fresh root yield	G42	0.944739	40	0.261771	0.235008	0.195011	0.353775
Fresh root yield	G29	0.943116	41	0.261771	-0.31761	0.195011	0.288556
Fresh root yield	G18	0.927457	42	0.261771	-0.423865	0.195011	0.480448
Fresh root yield	G55	0.925599	43	0.261771	-0.296297	0.195011	0.0423493
Fresh root yield	G49	0.921049	44	0.261771	0.0309364	0.195011	0.30545
Fresh root yield	G2	0.907429	45	0.261771	-0.363974	0.195011	0.195897
Fresh root yield	G25	0.894004	46	0.261771	0.0608518	0.195011	0.575606
Fresh root yield	G5	0.880042	47	0.261771	0.273411	0.195011	0.429743
Fresh root yield	G54	0.84419	48	0.261771	0.0893748	0.195011	0.0729432
Fresh root yield	G51	0.83522	49	0.261771	-0.0374387	0.195011	0.383901
Fresh root yield	G11	0.830875	50	0.261771	-0.337	0.195011	0.281912
Fresh root yield	G39	0.829831	51	0.261771	-0.246636	0.195011	0.21141
Fresh root yield	TMS982101	0.829031	52	0.261771	-0.110053	0.195011	0.247187
Fresh root yield	G30	0.790205	53	0.261771	0.150136	0.195011	0.755098
Fresh root yield	G44	0.758459	54	0.261771	-0.404544	0.195011	1.14867
Fresh root yield	G24	0.740367	55	0.261771	-0.744204	0.195011	0.104911
Fresh root yield	G9	0.696345	56	0.261771	-0.570828	0.195011	0.165151
Fresh root yield	G10	0.678044	57	0.261771	-0.333946	0.195011	0.566404
Fresh root yield	G48	0.667592	58	0.261771	-0.415644	0.195011	0.587323
Fresh root yield	G61	0.65526	59	0.261771	-0.443474	0.195011	0.100894
Fresh root yield	G43	0.640393	60	0.261771	-1.06717	0.195011	0.240649
Fresh root yield	G3	0.637038	61	0.261771	-0.474045	0.195011	0.150904
Fresh root yield	G26	0.610056	62	0.261771	-0.865941	0.195011	0.140799
Fresh root yield	G31	0.490399	63	0.261771	-0.112132	0.195011	0.14394
Fresh root yield	G15	0.464361	64	0.261771	-0.432947	0.195011	0.437518
Fresh root yield	TMEB419	0.408416	65	0.261771	-0.304012	0.195011	0.308545
Fresh root yield	TMS980581	0.377295	66	0.261771	-0.0787777	0.195011	0.184649
Fresh root yield	G46	0.368707	67	0.261771	-0.52226	0.195011	0.277396
gari%	G5	1.49495	1	0.234652	-0.976171	0.184078	0.155549
gari%	G4	1.46571	2	0.234652	0.250954	0.184078	0.192846
gari%	G18	1.35295	3	0.234652	0.260068	0.184078	0.0293493
gari%	G12	1.29326	4	0.234652	0.211114	0.184078	0.0952603
gari%	G31	1.28126	5	0.234652	-0.33201	0.184078	0.861369
gari%	G15	1.25583	6	0.234652	0.315908	0.184078	0.332268
gari%	G14	1.24328	7	0.234652	0.189194	0.184078	0.34846
gari%	G56	1.23581	8	0.234652	0.793978	0.184078	0.513142
gari%	G29	1.23438	9	0.234652	0.0627131	0.184078	0.38543
gari%	G58	1.23259	10	0.234652	-0.601901	0.184078	0.505607
gari%	G55	1.21879	11	0.234652	0.585737	0.184078	0.346882
gari%	G50	1.21533	12	0.234652	0.711292	0.184078	0.253438
gari%	G2	1.19391	13	0.234652	0.357389	0.184078	0.534598
gari%	G59	1.19247	14	0.234652	-0.226955	0.184078	0.113584
gari%	G51	1.18037	15	0.234652	-0.0660176	0.184078	0.160698
gari%	G28	1.17684	16	0.234652	0.0701634	0.184078	0.159721
gari%	G62	1.16801	17	0.234652	0.216212	0.184078	0.0917323
gari%	G6	1.14801	18	0.234652	-0.223711	0.184078	0.489505
gari%	G30	1.14735	19	0.234652	-0.178878	0.184078	0.1242
gari%	TMEB419	1.1398	20	0.234652	0.212354	0.184078	0.103222
gari%	G39	1.12205	21	0.234652	0.0157475	0.184078	0.39999
gari%	G48	1.12012	22	0.234652	0.0915622	0.184078	0.0553159
gari%	G1	1.10602	23	0.234652	-0.354341	0.184078	0.349057
gari%	G27	1.10217	24	0.234652	-0.495576	0.184078	0.332506
gari%	G8	1.10132	25	0.234652	0.132691	0.184078	0.123603
gari%	G41	1.09656	26	0.234652	0.154801	0.184078	0.131382
gari%	G13	1.08985	27	0.234652	-0.172796	0.184078	0.0899436
gari%	G37	1.07919	28	0.479269	0.0290151	0.236063	0.132979
gari%	G22	1.07717	29	0.234652	-0.131791	0.184078	0.553948
gari%	G52	1.05261	30	0.234652	-0.0418394	0.184078	0.363165
gari%	G60	1.02537	31	0.234652	0.0704656	0.184078	0.397288
gari%	G53	1.02417	32	0.234652	0.196887	0.184078	0.292541
gari%	G9	1.01699	33	0.234652	-0.166842	0.184078	0.534912
gari%	G40	1.0147	34	0.234652	0.616282	0.184078	0.0400817
gari%	TMS982101	1.00526	35	0.234652	-0.253285	0.184078	0.195766
gari%	G61	0.992252	36	0.234652	-0.168036	0.184078	0.162437
gari%	G49	0.982077	37	0.241126	-0.00912631	0.197474	0.242088
gari%	G11	0.967245	38	0.234652	-0.320548	0.184078	0.149932
gari%	G47	0.958718	39	0.234652	0.215938	0.184078	0.189099
gari%	TMS000070	0.957577	40	0.234652	-0.193021	0.184078	0.201065
gari%	G7	0.939353	41	0.234652	0.394247	0.184078	0.364314
gari%	G26	0.936846	42	0.234652	-0.987719	0.184078	0.468174
gari%	G35	0.905057	43	0.241126	-0.0554618	0.197474	0.0808542
gari%	G45	0.899278	44	0.241126	1.00072	0.197474	0.218796
gari%	G44	0.896874	45	0.254403	0.823014	0.198934	0.218671
gari%	G33	0.892875	46	0.234652	-0.0243503	0.184078	0.27756
gari%	TMS30572	0.886773	47	0.234652	-0.440677	0.184078	0.306024
gari%	TMS980581	0.877867	48	0.234652	-0.471321	0.184078	0.0796345
gari%	G42	0.869219	49	0.234652	0.51527	0.184078	0.106076
gari%	G10	0.86855	50	0.234652	-0.178342	0.184078	0.266915
gari%	G43	0.860174	51	0.234652	0.0695576	0.184078	0.10901
gari%	G23	0.858647	52	0.234652	0.539591	0.184078	0.261548
gari%	G34	0.824383	53	0.234652	0.106092	0.184078	0.256587
gari%	G36	0.8182	54	0.234652	-0.385281	0.184078	0.312515
gari%	G54	0.810162	55	0.234652	-0.182909	0.184078	0.355643
gari%	G25	0.798825	56	0.234652	0.0825197	0.184078	0.283929
gari%	G57	0.784635	57	0.234652	-0.273099	0.184078	0.0927499
gari%	G16	0.778464	58	0.234652	-0.339822	0.184078	0.208843
gari%	G46	0.763642	59	0.234652	0.0370433	0.184078	0.400396
gari%	G19	0.68406	60	0.234652	0.12983	0.184078	0.0355641
gari%	G20	0.678047	61	0.234652	-0.520421	0.184078	0.476275
gari%	G21	0.665194	62	0.234652	0.371564	0.184078	0.465221
gari%	G17	0.636115	63	0.234652	-0.903421	0.184078	0.212355
gari%	G3	0.603863	64	0.234652	-0.124218	0.184078	0.391922
gari%	G24	0.599956	65	0.234652	0.335936	0.184078	0.19423
gari%	G32	0.59048	66	0.234652	-0.039714	0.184078	0.160483
gari%	G38	0.510138	67	0.234652	0.106687	0.184078	0.507699
gari_yield	G37	1.96353	1	0.717708	-0.0658584	0.30812	0.228613
gari_yield	G34	1.68142	2	0.269351	0.224041	0.204239	1.17993
gari_yield	G1	1.42809	3	0.269351	0.171665	0.204239	0.290629
gari_yield	G62	1.41817	4	0.269351	-0.0265101	0.204239	0.325066
gari_yield	G58	1.39568	5	0.269351	-0.136098	0.204239	0.232775
gari_yield	G28	1.36197	6	0.269351	0.280938	0.204239	0.251061
gari_yield	G8	1.34743	7	0.269351	0.440853	0.204239	0.512888
gari_yield	G35	1.33923	8	0.335857	0.235343	0.225785	0.301876
gari_yield	G18	1.33711	9	0.269351	-0.195017	0.204239	0.518372
gari_yield	G20	1.31586	10	0.269351	0.212539	0.204239	0.158196
gari_yield	G13	1.28795	11	0.269351	0.559482	0.204239	0.113639
gari_yield	G17	1.26039	12	0.269351	0.216913	0.204239	0.401793
gari_yield	G56	1.25936	13	0.269351	0.644787	0.204239	0.546436
gari_yield	G45	1.23828	14	0.335857	0.202122	0.225785	0.459403
gari_yield	G47	1.23241	15	0.269351	0.0989927	0.204239	0.248767
gari_yield	G50	1.22027	16	0.269351	0.579857	0.204239	0.754795
gari_yield	G4	1.2034	17	0.269351	-0.192565	0.204239	0.248315
gari_yield	G27	1.18227	18	0.269351	-0.138075	0.204239	0.290214
gari_yield	G14	1.15861	19	0.269351	0.067755	0.204239	0.34776
gari_yield	G53	1.15759	20	0.269351	0.235114	0.204239	0.488141
gari_yield	G41	1.13719	21	0.269351	0.431752	0.204239	0.265569
gari_yield	G59	1.13447	22	0.269351	0.213994	0.204239	0.206216
gari_yield	G36	1.13062	23	0.269351	0.136462	0.204239	0.270263
gari_yield	G40	1.12908	24	0.269351	0.370241	0.204239	0.840792
gari_yield	G29	1.11229	25	0.269351	-0.23948	0.204239	0.344452
gari_yield	G7	1.11045	26	0.269351	0.0321632	0.204239	0.521552
gari_yield	G33	1.10833	27	0.269351	-0.29935	0.204239	0.0542374
gari_yield	TMS000070	1.10207	28	0.269351	0.363863	0.204239	0.136233
gari_yield	G19	1.09809	29	0.269351	0.191883	0.204239	0.166668
gari_yield	G21	1.09383	30	0.269351	0.502219	0.204239	0.105414
gari_yield	G44	1.08901	31	0.318775	0.333262	0.223741	0.152328
gari_yield	G12	1.06711	32	0.269351	0.339158	0.204239	0.225169
gari_yield	G39	1.05611	33	0.269351	-0.0438805	0.204239	0.890673
gari_yield	G2	1.05237	34	0.269351	-0.171051	0.204239	0.101849
gari_yield	G6	1.04775	35	0.269484	0.260619	0.218354	0.375417
gari_yield	G52	1.02818	36	0.269351	0.428996	0.204239	0.426044
gari_yield	G25	1.00753	37	0.269351	-0.0377848	0.204239	0.58311
gari_yield	G22	1.0018	38	0.269351	-0.00147369	0.204239	0.245359
gari_yield	G42	0.963879	39	0.269351	0.191098	0.204239	0.264075
gari_yield	G55	0.961028	40	0.269351	-0.0342549	0.204239	0.109552
gari_yield	G23	0.925002	41	0.269351	1.2878	0.204239	0.873551
gari_yield	G61	0.893743	42	0.269351	-0.351584	0.204239	0.262034
gari_yield	TMS30572	0.864923	43	0.269351	-0.714951	0.204239	0.0821708
gari_yield	G60	0.861069	44	0.269351	-0.180393	0.204239	0.196612
gari_yield	G57	0.858716	45	0.269351	0.0785562	0.204239	0.20477
gari_yield	G51	0.851765	46	0.269351	-0.0543913	0.204239	0.344367
gari_yield	G5	0.810351	47	0.269351	-0.228211	0.204239	0.343931
gari_yield	G11	0.779392	48	0.269351	-0.369432	0.204239	0.432894
gari_yield	G16	0.771213	49	0.269351	-0.451339	0.204239	0.330774
gari_yield	TMS982101	0.737012	50	0.269351	-0.306475	0.204239	0.183409
gari_yield	G30	0.734363	51	0.269351	-0.228379	0.204239	0.450085
gari_yield	G24	0.733327	52	0.269351	-0.459588	0.204239	0.131622
gari_yield	G43	0.701012	53	0.269351	-0.907737	0.204239	0.115637
gari_yield	G3	0.699527	54	0.269351	-0.345826	0.204239	0.132141
gari_yield	G15	0.693634	55	0.269351	-0.425704	0.204239	0.178882
gari_yield	G54	0.688672	56	0.269351	0.0855872	0.204239	0.182778
gari_yield	G38	0.677954	57	0.269351	0.356244	0.204239	0.199081
gari_yield	G49	0.673322	58	0.335857	0.0201788	0.225785	0.0605198
gari_yield	G9	0.630569	59	0.269351	-0.691858	0.204239	0.218268
gari_yield	G10	0.603696	60	0.269351	-0.225273	0.204239	0.651534
gari_yield	G31	0.595824	61	0.269351	-0.108537	0.204239	0.350273
gari_yield	G46	0.557118	62	0.269351	-0.554307	0.204239	0.366304
gari_yield	G32	0.550956	63	0.269351	-0.51933	0.204239	0.709521
gari_yield	G48	0.54275	64	0.269351	-0.194293	0.204239	0.367984
gari_yield	G26	0.512442	65	0.269351	-1.03718	0.204239	0.148838
gari_yield	TMS980581	0.417778	66	0.269351	-0.223109	0.204239	0.099281
gari_yield	TMEB419	0.413686	67	0.269351	-0.148651	0.204239	0.112659
Harvest index	G6	2.07865	1	0.361448	0.233652	0.224738	0.210703
Harvest index	G34	2.01698	2	0.318318	0.675892	0.206521	0.212445
Harvest index	G8	1.96913	3	0.318318	0.824894	0.206521	0.944009
Harvest index	G62	1.72616	4	0.318318	0.586433	0.206521	0.68773
Harvest index	G61	1.60918	5	0.318318	-0.657556	0.206521	0.396052
Harvest index	G59	1.45113	6	0.318318	0.864434	0.206521	0.867055
Harvest index	G27	1.451	7	0.318318	0.26921	0.206521	0.54605
Harvest index	G30	1.42418	8	0.318318	0.185255	0.206521	0.250936
Harvest index	G25	1.40651	9	0.318318	0.301404	0.206521	0.303126
Harvest index	G4	1.39559	10	0.318318	0.379293	0.206521	0.0353181
Harvest index	G28	1.32078	11	0.318318	0.503558	0.206521	0.26734
Harvest index	G18	1.30033	12	0.318318	-0.204205	0.206521	0.0820014
Harvest index	G14	1.28602	13	0.318318	-0.0435309	0.206521	0.140847
Harvest index	G19	1.26699	14	0.318318	0.479934	0.206521	0.0944436
Harvest index	G53	1.25108	15	0.318318	0.182268	0.206521	0.519475
Harvest index	G40	1.24849	16	0.318318	0.474543	0.206521	0.419608
Harvest index	G45	1.24112	17	0.318318	-0.0736235	0.206521	0.23952
Harvest index	G58	1.18824	18	0.318318	0.376669	0.206521	0.132467
Harvest index	G15	1.18593	19	0.318318	-0.418155	0.206521	0.392617
Harvest index	G39	1.17628	20	0.318506	-0.127431	0.220797	0.413354
Harvest index	G29	1.15661	21	0.318318	0.216972	0.206521	0.310142
Harvest index	G33	1.10882	22	0.318318	-0.359436	0.206521	0.167796
Harvest index	G41	1.08596	23	0.318318	1.1289	0.206521	0.223101
Harvest index	G20	1.07361	24	0.318318	0.571468	0.206521	0.21687
Harvest index	TMS000070	1.07259	25	0.318318	0.594426	0.206521	0.104668
Harvest index	G3	1.06194	26	0.318318	-0.456346	0.206521	0.162565
Harvest index	TMS980581	1.05833	27	0.318318	-0.318996	0.206521	0.232747
Harvest index	G47	1.05604	28	0.318318	0.16384	0.206521	0.349449
Harvest index	G11	1.05116	29	0.318318	-0.551534	0.206521	0.173614
Harvest index	G17	1.0288	30	0.318318	0.535399	0.206521	0.421772
Harvest index	G36	0.985942	31	0.318318	1.00658	0.206521	0.0878784
Harvest index	G16	0.983612	32	0.318318	-0.166495	0.206521	0.69179
Harvest index	G24	0.971922	33	0.318318	-0.594379	0.206521	0.36652
Harvest index	G38	0.970368	34	0.318318	0.0841823	0.206521	0.0643794
Harvest index	G26	0.964335	35	0.318318	-1.44105	0.206521	0.575688
Harvest index	G13	0.951485	36	0.318318	0.245202	0.206521	0.0307684
Harvest index	G42	0.933604	37	0.318318	-0.0168954	0.206521	0.447033
Harvest index	TMS982101	0.914462	38	0.318318	-0.584495	0.206521	0.240595
Harvest index	G21	0.909449	39	0.318318	1.18169	0.206521	0.371729
Harvest index	G60	0.890806	40	0.318318	-0.412344	0.206521	0.227879
Harvest index	G31	0.878215	41	0.318318	-0.09308	0.206521	0.246174
Harvest index	G1	0.87421	42	0.318318	-0.157565	0.206521	0.274862
Harvest index	G7	0.859203	43	0.318318	-0.429087	0.206521	0.160517
Harvest index	G2	0.842713	44	0.318318	-0.348263	0.206521	0.387642
Harvest index	G54	0.829478	45	0.318318	-0.526099	0.206521	0.0945114
Harvest index	G48	0.784557	46	0.318318	-0.951437	0.206521	0.705616
Harvest index	G56	0.770673	47	0.318318	-0.17157	0.206521	0.158727
Harvest index	G32	0.757524	48	0.318318	0.15451	0.206521	0.49876
Harvest index	G57	0.747311	49	0.318318	0.0400859	0.206521	0.237364
Harvest index	G37	0.72763	50	0.362443	0.438306	0.242529	0.037805
Harvest index	TMS30572	0.723099	51	0.318318	-0.635674	0.206521	0.204976
Harvest index	G46	0.721855	52	0.318318	-0.616749	0.206521	1.64553
Harvest index	G55	0.712867	53	0.318318	-0.236629	0.206521	0.211752
Harvest index	G5	0.7103	54	0.318318	-0.36689	0.206521	0.224659
Harvest index	G52	0.709893	55	0.318318	-0.0872912	0.206521	0.321172
Harvest index	G35	0.705358	56	0.318318	0.134746	0.206521	0.615773
Harvest index	G43	0.644416	57	0.318318	-0.403105	0.206521	0.574254
Harvest index	G44	0.630236	58	0.318318	0.47665	0.206521	0.798125
Harvest index	G51	0.600332	59	0.318318	-0.531417	0.206521	0.104633
Harvest index	G23	0.599338	60	0.318318	0.19577	0.206521	0.234093
Harvest index	G12	0.589468	61	0.318318	0.000558069	0.206521	0.173953
Harvest index	G22	0.584819	62	0.318318	0.512628	0.206521	0.192816
Harvest index	G50	0.42313	63	0.318318	0.00251081	0.206521	0.530955
Harvest index	G9	0.378954	64	0.318318	-0.730047	0.206521	0.167425
Harvest index	G10	0.372078	65	0.318318	-0.535383	0.206521	0.389018
Harvest index	TMEB419	0.35356	66	0.318318	-0.470983	0.206521	0.346784
Harvest index	G49	0.245159	67	0.318318	-0.317385	0.206521	0.473513
Peel loss	G5	1.77564	1	0.242145	0.283671	0.184044	0.211341
Peel loss	G45	1.51412	2	0.242694	-0.322946	0.196807	0.0928858
Peel loss	G9	1.49148	3	0.242145	0.43291	0.184044	0.388528
Peel loss	G42	1.45112	4	0.242145	0.203508	0.184044	0.0411159
Peel loss	G7	1.39285	5	0.242145	0.00369455	0.184044	0.257844
Peel loss	G33	1.36612	6	0.242145	0.569906	0.184044	0.447791
Peel loss	G10	1.36557	7	0.242145	-0.0748758	0.184044	0.539342
Peel loss	G49	1.3354	8	0.242694	0.138372	0.196807	0.0803906
Peel loss	G28	1.25721	9	0.242145	-0.258029	0.184044	0.471069
Peel loss	G55	1.25307	10	0.242145	-0.170708	0.184044	0.142444
Peel loss	TMEB419	1.22873	11	0.242145	-0.332995	0.184044	0.343868
Peel loss	TMS30572	1.19313	12	0.242145	-0.0367931	0.184044	0.0525577
Peel loss	G46	1.17391	13	0.242145	0.17348	0.184044	0.302191
Peel loss	G50	1.16423	14	0.242145	-0.468073	0.184044	0.155613
Peel loss	G48	1.16276	15	0.242145	0.0734293	0.184044	0.414182
Peel loss	G32	1.15568	16	0.242145	0.55279	0.184044	0.210839
Peel loss	G52	1.15066	17	0.242145	-0.116046	0.184044	0.151838
Peel loss	G38	1.14971	18	0.242145	-0.409538	0.184044	0.0292065
Peel loss	G14	1.14771	19	0.242145	-0.376704	0.184044	0.387195
Peel loss	G62	1.11601	20	0.242145	-0.57771	0.184044	0.12388
Peel loss	G47	1.10791	21	0.242145	-0.111428	0.184044	0.201974
Peel loss	G15	1.093	22	0.242145	0.0359715	0.184044	0.286763
Peel loss	G16	1.0846	23	0.242145	0.741147	0.184044	0.866178
Peel loss	G24	1.08152	24	0.242145	0.637864	0.184044	0.272214
Peel loss	G35	1.07901	25	0.242694	0.204261	0.196807	0.151194
Peel loss	G30	1.07764	26	0.242145	0.242481	0.184044	0.291933
Peel loss	G39	1.06981	27	0.242145	-0.368642	0.184044	0.670028
Peel loss	G21	1.06754	28	0.242145	-0.471429	0.184044	0.319679
Peel loss	G2	1.04476	29	0.242145	0.124925	0.184044	0.388185
Peel loss	G3	1.039	30	0.242145	0.52654	0.184044	0.480596
Peel loss	G27	1.03434	31	0.242145	-0.492266	0.184044	0.163623
Peel loss	G31	1.00881	32	0.242145	0.865676	0.184044	0.166903
Peel loss	TMS980581	1.0021	33	0.242145	0.468855	0.184044	0.120389
Peel loss	G57	0.996469	34	0.242145	0.653597	0.184044	0.35269
Peel loss	G44	0.98641	35	0.275004	-0.312215	0.200283	0.123321
Peel loss	G29	0.977764	36	0.242145	0.286158	0.184044	0.154582
Peel loss	G11	0.974606	37	0.242145	-0.0230116	0.184044	0.46258
Peel loss	G53	0.954915	38	0.242145	0.051621	0.184044	0.108996
Peel loss	G59	0.943513	39	0.242145	0.142863	0.184044	0.210799
Peel loss	G4	0.921563	40	0.242145	0.437085	0.184044	0.251215
Peel loss	G26	0.917812	41	0.242145	0.244523	0.184044	0.161578
Peel loss	G54	0.90812	42	0.242145	-0.0401217	0.184044	0.116222
Peel loss	G25	0.888956	43	0.242145	-0.16129	0.184044	0.462081
Peel loss	G17	0.887659	44	0.242145	-0.0866643	0.184044	0.100941
Peel loss	G12	0.862867	45	0.242145	-0.208263	0.184044	0.0587009
Peel loss	G58	0.857073	46	0.242145	0.0585885	0.184044	0.787686
Peel loss	G6	0.850247	47	0.242145	0.175855	0.184044	0.235525
Peel loss	G40	0.843189	48	0.242145	-0.347996	0.184044	0.143742
Peel loss	TMS982101	0.832799	49	0.242145	-0.73239	0.184044	0.208438
Peel loss	TMS000070	0.810151	50	0.242145	-0.648023	0.184044	0.0946281
Peel loss	G51	0.809483	51	0.242145	0.0506315	0.184044	0.172602
Peel loss	G19	0.799542	52	0.242145	0.529434	0.184044	0.313248
Peel loss	G36	0.794839	53	0.242145	0.220155	0.184044	0.0658754
Peel loss	G20	0.786726	54	0.242145	0.308803	0.184044	0.346389
Peel loss	G8	0.785098	55	0.242145	-0.61454	0.184044	0.143039
Peel loss	G61	0.781024	56	0.242145	0.963264	0.184044	0.829302
Peel loss	G13	0.779225	57	0.242145	-0.459695	0.184044	0.0864661
Peel loss	G60	0.778522	58	0.242145	-0.00164305	0.184044	0.637131
Peel loss	G18	0.777081	59	0.242145	-0.151018	0.184044	0.204115
Peel loss	G43	0.766713	60	0.242145	0.845797	0.184044	0.380483
Peel loss	G22	0.761867	61	0.242145	-0.302886	0.184044	0.604744
Peel loss	G1	0.648274	62	0.242145	-0.353168	0.184044	0.056376
Peel loss	G37	0.64257	63	0.279698	0.238749	0.236455	0.011641
Peel loss	G34	0.601853	64	0.242145	-0.220014	0.184044	0.304512
Peel loss	G56	0.556084	65	0.242145	-0.508553	0.184044	0.0691425
Peel loss	G23	0.547758	66	0.242145	-0.396671	0.184044	0.111922
Peel loss	G41	0.334072	67	0.242145	-1.03405	0.184044	0.244831
Root number	G46	1.70767	1	0.320988	0.704529	0.216247	0.531782
Root number	G55	1.60105	2	0.320988	-0.341924	0.216247	0.159729
Root number	G22	1.53765	3	0.320988	0.297507	0.216247	0.213241
Root number	G59	1.4689	4	0.320988	1.07519	0.216247	0.535153
Root number	G4	1.46488	5	0.320988	0.940032	0.216247	0.468859
Root number	G13	1.4027	6	0.320988	-0.0361842	0.216247	0.407766
Root number	G29	1.31351	7	0.320988	0.523208	0.216247	0.388748
Root number	G38	1.30508	8	0.320988	-0.0256968	0.216247	0.432703
Root number	G51	1.26828	9	0.320988	0.69281	0.216247	0.712989
Root number	G18	1.26827	10	0.320988	-0.287613	0.216247	0.460456
Root number	G36	1.22629	11	0.320988	0.3152	0.216247	0.812739
Root number	G23	1.22493	12	0.320988	-0.262188	0.216247	0.291521
Root number	G10	1.21103	13	0.320988	-0.21679	0.216247	0.183828
Root number	G25	1.20669	14	0.320988	0.111705	0.216247	0.227617
Root number	G27	1.16716	15	0.320988	-0.509034	0.216247	0.322628
Root number	TMS30572	1.16364	16	0.320988	-0.290406	0.216247	0.781328
Root number	G58	1.14062	17	0.320988	0.44771	0.216247	0.0614472
Root number	G26	1.13462	18	0.320988	0.114558	0.216247	0.457838
Root number	TMEB419	1.13396	19	0.320988	0.122521	0.216247	0.524358
Root number	TMS980581	1.11685	20	0.320988	-0.610654	0.216247	0.187676
Root number	G41	1.10053	21	0.320988	0.36768	0.216247	0.343501
Root number	G43	1.10002	22	0.320988	0.109086	0.216247	0.169542
Root number	G35	1.09785	23	0.320988	1.37637	0.216247	0.431983
Root number	G16	1.09596	24	0.320988	0.169733	0.216247	0.427493
Root number	G24	1.08762	25	0.320988	-0.0765262	0.216247	0.402147
Root number	G1	1.08428	26	0.320988	-0.134052	0.216247	0.486017
Root number	G2	1.06478	27	0.320988	-0.216586	0.216247	1.29625
Root number	G15	1.04959	28	0.320988	0.300355	0.216247	0.186651
Root number	G6	1.04115	29	0.320988	0.273942	0.216247	0.255678
Root number	G17	1.00365	30	0.320988	0.654113	0.216247	0.450297
Root number	G21	0.996924	31	0.320988	-0.131638	0.216247	0.159393
Root number	G52	0.994533	32	0.320988	0.305686	0.216247	0.689168
Root number	G44	0.986754	33	0.320988	0.414473	0.216247	0.0253269
Root number	G31	0.96672	34	0.320988	-0.135529	0.216247	0.119404
Root number	G20	0.952429	35	0.320988	0.246872	0.216247	0.248248
Root number	G39	0.94433	36	0.320988	-0.295131	0.216247	0.165475
Root number	G60	0.940772	37	0.320988	0.5696	0.216247	0.499905
Root number	G45	0.936	38	0.320988	-0.741719	0.216247	0.0415362
Root number	G14	0.923373	39	0.320988	-0.429077	0.216247	0.151874
Root number	G30	0.917305	40	0.338352	-0.58944	0.251161	0.1582
Root number	G32	0.911156	41	0.320988	-0.0338832	0.216247	0.368195
Root number	G9	0.899073	42	0.320988	-0.181209	0.216247	0.276255
Root number	G56	0.893114	43	0.320988	-0.70893	0.216247	0.269794
Root number	G48	0.884499	44	0.320988	-0.551317	0.216247	0.369178
Root number	G57	0.882923	45	0.320988	0.0657728	0.216247	0.604726
Root number	TMS000070	0.872489	46	0.320988	0.0803915	0.216247	0.0787452
Root number	G61	0.871347	47	0.320988	-0.388532	0.216247	0.441656
Root number	TMS982101	0.831395	48	0.320988	-0.826312	0.216247	0.30505
Root number	G7	0.829349	49	0.320988	0.0640928	0.216247	0.987839
Root number	G50	0.815752	50	0.320988	0.0832359	0.216247	0.221679
Root number	G11	0.815724	51	0.320988	-0.540339	0.216247	0.469693
Root number	G12	0.806331	52	0.320988	-0.44571	0.216247	0.103756
Root number	G34	0.805206	53	0.320988	0.304662	0.216247	0.258279
Root number	G3	0.800625	54	0.320988	-0.10884	0.216247	0.0963482
Root number	G49	0.798487	55	0.320988	1.16026	0.216247	0.39376
Root number	G33	0.786339	56	0.320988	-0.152443	0.216247	0.178341
Root number	G40	0.783266	57	0.320988	-0.353044	0.216247	0.346244
Root number	G53	0.762384	58	0.320988	-0.583428	0.216247	0.984153
Root number	G19	0.756405	59	0.320988	0.204721	0.216247	1.26505
Root number	G42	0.75526	60	0.320988	-0.636531	0.216247	0.492427
Root number	G37	0.747591	61	0.320988	0.632898	0.216247	0.425796
Root number	G54	0.708978	62	0.320988	-0.347581	0.216247	0.372037
Root number	G47	0.686613	63	0.320988	0.131751	0.216247	0.162443
Root number	G8	0.63063	64	0.320988	-0.464717	0.216247	0.113973
Root number	G5	0.626665	65	0.320988	-0.542831	0.216247	0.0320158
Root number	G62	0.402043	66	0.320988	0.0330179	0.216247	0.319053
Root number	G28	0.287993	67	0.320988	-0.790271	0.216247	0.133144
Root size	G6	4.03728	1	1.11582	0.571382	0.279125	0.45088
Root size	G57	3.81054	2	1.11582	0.501283	0.279125	0.567298
Root size	G22	3.69618	3	1.11582	0.139956	0.279125	0.416359
Root size	G29	3.62776	4	1.11582	0.160306	0.279125	0.100824
Root size	G45	3.58157	5	1.11582	0.125205	0.279125	0.371204
Root size	G16	3.52086	6	1.11582	0.669564	0.279125	0.695504
Root size	G21	3.4973	7	1.11582	0.328416	0.279125	0.171056
Root size	G23	3.16599	8	1.11582	0.388861	0.279125	0.532834
Root size	G44	3.10286	9	1.11582	0.322719	0.279125	0.447553
Root size	G8	2.99216	10	1.11582	-0.348028	0.279125	1.05791
Root size	G14	2.88715	11	1.11582	0.393788	0.279125	1.14423
Root size	G33	2.80862	12	1.11582	0.143293	0.279125	0.421505
Root size	G13	2.66712	13	1.11582	-0.642566	0.279125	0.411637
Root size	G28	2.62105	14	1.11582	0.634089	0.279125	0.551992
Root size	G39	2.60935	15	1.11582	0.602942	0.279125	0.276349
Root size	TMS000070	2.48043	16	1.11582	-0.234808	0.279125	0.37778
Root size	G11	2.42006	17	1.11582	0.524902	0.279125	1.33061
Root size	G25	2.40462	18	1.11582	-0.531697	0.279125	0.272096
Root size	G24	2.31498	19	1.11582	0.198173	0.279125	1.1218
Root size	G35	2.27927	20	1.11582	0.411743	0.279125	1.14566
Root size	G52	2.23014	21	1.11582	-0.528018	0.279125	0.426802
Root size	G59	2.12447	22	1.11582	0.300435	0.279125	0.483503
Root size	G56	2.03849	23	1.11582	0.0492075	0.279125	0.745593
Root size	G40	1.93248	24	1.11582	-0.263719	0.279125	0.0739638
Root size	G36	1.8504	25	1.11582	-0.281217	0.279125	0.0630309
Root size	G18	1.6547	26	1.11582	0.484365	0.279125	1.24399
Root size	G31	1.65429	27	1.11582	1.10266	0.279125	1.24583
Root size	G5	1.58984	28	1.11582	-0.0615664	0.279125	0.545782
Root size	G42	1.54309	29	1.11582	-0.300617	0.279125	0.0828936
Root size	G47	1.49151	30	1.11582	0.0382933	0.279125	1.21179
Root size	G7	1.48819	31	1.11582	-0.238366	0.279125	0.0656556
Root size	G3	1.44082	32	1.11582	0.302187	0.279125	2.06249
Root size	G55	1.42667	33	1.11582	0.448795	0.279125	0.46313
Root size	G9	1.2639	34	1.11582	-0.163898	0.279125	0.249967
Root size	TMEB419	1.25438	35	1.11582	-1.06286	0.279125	0.990905
Root size	G43	0.923283	36	1.11582	0.199838	0.279125	0.398771
Root size	G51	0.780694	37	1.11582	0.406256	0.279125	0.43459
Root size	TMS982101	0.655427	38	1.11582	-0.317977	0.279125	0.733389
Root size	G61	0.648048	39	1.11582	0.468782	0.279125	0.332317
Root size	G53	0.631924	40	1.11582	-0.7258	0.279125	0.28842
Root size	G48	0.410818	41	1.11582	1.43076	0.279125	1.62273
Root size	TMS30572	0.207281	42	1.11582	0.443833	0.279125	0.929652
Root size	G34	0.170138	43	1.11582	0.694971	0.279125	0.992893
Root size	G15	0.145311	44	1.11582	-0.55368	0.279125	0.498297
Root size	G49	0.132284	45	1.11582	-0.424332	0.279125	0.0696685
Root size	G4	0.0874969	46	1.11582	-0.303401	0.279125	0.185395
Root size	G19	0.033875	47	1.11582	-0.586687	0.279125	0.010876
Root size	G50	-0.0384125	48	1.11582	-0.213124	0.279125	0.56042
Root size	G26	-0.169186	49	1.11582	-0.229868	0.279125	0.320974
Root size	G37	-0.173504	50	1.11582	0.521632	0.279125	1.67263
Root size	G62	-0.259922	51	1.11582	0.326581	0.279125	1.04435
Root size	G27	-0.284724	52	1.11582	-0.41816	0.279125	0.0440256
Root size	G54	-0.324962	53	1.11582	0.658376	0.279125	1.1059
Root size	G32	-0.459558	54	1.11582	-0.427143	0.279125	0.373005
Root size	G20	-0.472891	55	1.11582	-0.627562	0.279125	0.307939
Root size	G46	-0.519493	56	1.11582	-0.398429	0.279125	0.320618
Root size	G2	-0.756582	57	1.11582	-0.488077	0.279125	0.441646
Root size	G58	-1.06174	58	1.11582	-0.0983247	0.279125	0.32794
Root size	TMS980581	-1.09017	59	1.11582	0.678325	0.279125	1.01847
Root size	G60	-1.16586	60	1.11582	-0.56157	0.279125	0.916201
Root size	G10	-1.42737	61	1.11582	-0.764651	0.279125	0.212807
Root size	G17	-1.53444	62	1.11582	-0.498302	0.279125	0.387117
Root size	G38	-2.22614	63	1.11582	-1.29945	0.279125	1.47433
Root size	G30	-2.33028	64	1.16329	-0.122595	0.322451	0.541338
Root size	G1	-2.52944	65	1.11582	-0.233503	0.279125	1.21015
Root size	G12	-2.67441	66	1.11582	-0.243909	0.279125	0.271818
Root size	G41	-3.83602	67	1.11582	-0.494097	0.279125	0.683236

## Sheet: S7 stability genotype rank
		Wrickle ecovalence stability analysis and Geometric Adaptability index genotype ranks for 12 cassava traits
Trait	Group	Genotype	Genotype_code	GAI	GAI_rank	Ecoval	Ecov_perc	Ecoval_rank
Dry matter content	Checks	TMS30572	TMS30572	32.4453	56	15.7432	0.209233	1
Dry matter content	Advanced genotypes	TMS14F1195P0005	G33	35.8786	9	24.2683	0.322534	2
Dry matter content	Checks	TMEB419	TMEB419	35.0917	18	28.429	0.377832	3
Dry matter content	Advanced genotypes	TMS14F1306P0015	G56	36.9589	4	29.6958	0.394668	4
Dry matter content	Checks	TMS982101	TMS982101	30.9862	62	32.0568	0.426047	5
Dry matter content	Advanced genotypes	TMS14F1196P0003	G34	33.4134	43	35.1653	0.46736	6
Dry matter content	Advanced genotypes	TMS14F1036P0007	G23	35.6328	12	41.2087	0.547679	7
Dry matter content	Advanced genotypes	TMS14F1310P0004	G58	31.4606	60	42.1978	0.560825	8
Dry matter content	Advanced genotypes	TMS14F1291P0011	G44	36.4536	6	42.82	0.569094	9
Dry matter content	Advanced genotypes	TMS13F1461P0002	G10	35.055	19	47.4668	0.630851	10
Dry matter content	Advanced genotypes	TMS14F1013P0007	G14	33.7329	36	49.0791	0.652279	11
Dry matter content	Advanced genotypes	TMS14F1299P0007	G49	34.9334	21	52.4477	0.697049	12
Dry matter content	Advanced genotypes	TMS14F1223P0007	G36	32.8071	51	52.5481	0.698384	13
Dry matter content	Advanced genotypes	TMS13F1376P0018	G8	32.9518	48	53.0748	0.705384	14
Dry matter content	Checks	TMS980581	TMS980581	32.4838	54	53.3435	0.708955	15
Dry matter content	Advanced genotypes	TMS14F1312P0003	G61	35.9905	8	56.5108	0.75105	16
Dry matter content	Advanced genotypes	TMS14F1311P0002	G60	32.9286	49	61.8051	0.821412	17
Dry matter content	Advanced genotypes	TMS14F1301P0013	G53	35.1073	17	63.5759	0.844947	18
Dry matter content	Advanced genotypes	TMS14F1300P0002	G50	35.2337	15	64.0364	0.851067	19
Dry matter content	Advanced genotypes	TMS14F1224P0004	G37	14.233	67	66.5711	0.884755	20
Dry matter content	Advanced genotypes	TMS14F1295P0012	G47	32.8195	50	70.795	0.940891	21
Dry matter content	Advanced genotypes	TMS14F1306P0020	G57	33.5323	40	72.2857	0.960704	22
Dry matter content	Advanced genotypes	TMS14F1278P0003	G39	33.8382	33	75.6496	1.00541	23
Dry matter content	Advanced genotypes	TMS13F1021P0008	G1	31.973	59	75.8325	1.00784	24
Dry matter content	Advanced genotypes	TMS14F1125P0010	G27	30.0126	64	76.6799	1.0191	25
Dry matter content	Checks	TMS000070	TMS000070	32.585	53	78.7857	1.04709	26
Dry matter content	Advanced genotypes	TMS14F1014P0017	G16	33.3442	45	79.4176	1.05549	27
Dry matter content	Advanced genotypes	TMS14F1287P0008	G42	35.5756	14	80.6667	1.07209	28
Dry matter content	Advanced genotypes	TMS14F1016P0006	G17	31.1193	61	81.3282	1.08088	29
Dry matter content	Advanced genotypes	TMS14F1022P0003	G19	35.5987	13	87.8678	1.1678	30
Dry matter content	Advanced genotypes	TMS14F1291P0012	G45	37.0525	2	91.9518	1.22207	31
Dry matter content	Advanced genotypes	TMS14F1300P0008	G51	33.4931	41	92.0334	1.22316	32
Dry matter content	Advanced genotypes	TMS14F1146P0002	G29	33.8616	32	93.8932	1.24788	33
Dry matter content	Advanced genotypes	TMS13F2207P0001	G12	34.8641	22	95.4772	1.26893	34
Dry matter content	Advanced genotypes	TMS14F1285P0017	G41	33.7555	34	102.089	1.3568	35
Dry matter content	Advanced genotypes	TMS14F1288P0008	G43	35.878	10	105.48	1.40187	36
Dry matter content	Advanced genotypes	TMS14F1159P0003	G30	33.3106	46	111.83	1.48626	37
Dry matter content	Advanced genotypes	TMS14F1303P0012	G54	34.6311	25	112.555	1.4959	38
Dry matter content	Advanced genotypes	TMS14F1301P0004	G52	33.01	47	118.185	1.57072	39
Dry matter content	Advanced genotypes	TMS14F1291P0003	G62	32.2988	58	120.262	1.59832	40
Dry matter content	Advanced genotypes	TMS14F1285P0006	G40	35.9955	7	121.073	1.60911	41
Dry matter content	Advanced genotypes	TMS14F1297P0019	G48	34.8035	23	123.49	1.64122	42
Dry matter content	Advanced genotypes	TMS14F1049P0001	G24	36.547	5	130.29	1.7316	43
Dry matter content	Advanced genotypes	TMS14F1292P0012	G46	33.4383	42	131.58	1.74875	44
Dry matter content	Advanced genotypes	TMS13F1126P0003	G4	37.0879	1	134.398	1.7862	45
Dry matter content	Advanced genotypes	TMS14F1001P0004	G13	30.752	63	135.977	1.80719	46
Dry matter content	Advanced genotypes	TMS14F1035P0004	G21	37.0263	3	136.026	1.80784	47
Dry matter content	Advanced genotypes	TMS14F1195P0004	G32	34.5594	26	137.355	1.82549	48
Dry matter content	Advanced genotypes	TMS13F1304P0003	G6	34.3265	30	138.143	1.83598	49
Dry matter content	Advanced genotypes	TMS13F1182P0002	G5	29.9317	65	143.781	1.9109	50
Dry matter content	Advanced genotypes	TMS13F2061P0005	G11	32.4379	57	148.393	1.97219	51
Dry matter content	Advanced genotypes	TMS14F1098P0013	G25	33.4072	44	148.604	1.975	52
Dry matter content	Advanced genotypes	TMS14F1022P0006	G20	32.4832	55	149.909	1.99235	53
Dry matter content	Advanced genotypes	TMS13F1315P0008	G7	34.2134	31	152.793	2.03067	54
Dry matter content	Advanced genotypes	TMS14F1019P0015	G18	34.7929	24	155.925	2.0723	55
Dry matter content	Advanced genotypes	TMS14F1262P0002	G38	33.7417	35	163.064	2.16718	56
Dry matter content	Advanced genotypes	TMS14F1014P0016	G15	34.3874	29	172.874	2.29755	57
Dry matter content	Advanced genotypes	TMS14F1310P0015	G59	32.737	52	174.054	2.31324	58
Dry matter content	Advanced genotypes	TMS14F1035P0007	G22	33.6059	39	178.101	2.36703	59
Dry matter content	Advanced genotypes	TMS14F1131P0001	G28	33.6548	38	182.347	2.42345	60
Dry matter content	Advanced genotypes	TMS14F1208P0007	G35	34.5001	28	185.389	2.46389	61
Dry matter content	Advanced genotypes	TMS13F1049P0001	G2	35.8423	11	201.152	2.67339	62
Dry matter content	Advanced genotypes	TMS14F1120P0003	G26	29.3961	66	208.104	2.76578	63
Dry matter content	Advanced genotypes	TMS13F1114P0001	G3	35.128	16	239.327	3.18074	64
Dry matter content	Advanced genotypes	TMS13F1400P0001	G9	33.7225	37	243.756	3.23961	65
Dry matter content	Advanced genotypes	TMS14F1306P0008	G55	35.0004	20	308.507	4.10018	66
Dry matter content	Advanced genotypes	TMS14F1194P0002	G31	34.5057	27	444.725	5.91056	67
Dry root yield	Advanced genotypes	TMS14F1195P0005	G33	9.40255	57	19.2587	0.251374	1
Dry root yield	Checks	TMS30572	TMS30572	8.20778	64	25.078	0.32733	2
Dry root yield	Advanced genotypes	TMS14F1301P0004	G52	12.9272	3	33.6644	0.439403	3
Dry root yield	Advanced genotypes	TMS14F1223P0007	G36	10.949	28	35.4606	0.462848	4
Dry root yield	Advanced genotypes	TMS14F1310P0004	G58	9.47326	54	37.9463	0.495293	5
Dry root yield	Advanced genotypes	TMS14F1262P0002	G38	12.5945	8	38.4667	0.502085	6
Dry root yield	Advanced genotypes	TMS14F1049P0001	G24	8.88964	63	43.3462	0.565775	7
Dry root yield	Checks	TMS000070	TMS000070	12.861	5	47.4056	0.61876	8
Dry root yield	Advanced genotypes	TMS14F1288P0008	G43	7.29515	65	47.9547	0.625928	9
Dry root yield	Advanced genotypes	TMS14F1295P0012	G47	10.688	33	51.6839	0.674603	10
Dry root yield	Advanced genotypes	TMS14F1035P0004	G21	13.2468	2	55.6192	0.725969	11
Dry root yield	Advanced genotypes	TMS14F1303P0012	G54	11.8638	16	56.9715	0.743619	12
Dry root yield	Advanced genotypes	TMS14F1306P0008	G55	10.2882	39	59.2272	0.773062	13
Dry root yield	Advanced genotypes	TMS13F2061P0005	G11	9.14303	61	60.9013	0.794913	14
Dry root yield	Advanced genotypes	TMS14F1125P0010	G27	10.5822	34	64.5807	0.842937	15
Dry root yield	Advanced genotypes	TMS14F1013P0007	G14	11.04	26	64.6547	0.843903	16
Dry root yield	Advanced genotypes	TMS14F1306P0015	G56	12.5332	9	65.0444	0.848991	17
Dry root yield	Advanced genotypes	TMS14F1022P0003	G19	12.8269	6	67.6358	0.882814	18
Dry root yield	Advanced genotypes	TMS13F2207P0001	G12	12.3892	11	68.1854	0.889988	19
Dry root yield	Advanced genotypes	TMS14F1224P0004	G37	4.57137	67	69.686	0.909574	20
Dry root yield	Checks	TMS982101	TMS982101	9.69138	50	71.6309	0.93496	21
Dry root yield	Advanced genotypes	TMS14F1001P0004	G13	11.7971	17	73.996	0.965831	22
Dry root yield	Advanced genotypes	TMS14F1287P0008	G42	12.3166	14	81.0513	1.05792	23
Dry root yield	Advanced genotypes	TMS14F1278P0003	G39	10.0796	43	83.975	1.09608	24
Dry root yield	Advanced genotypes	TMS14F1312P0003	G61	10.1318	41	86.1558	1.12455	25
Dry root yield	Advanced genotypes	TMS14F1019P0015	G18	9.40649	56	90.827	1.18552	26
Dry root yield	Advanced genotypes	TMS13F1400P0001	G9	8.9308	62	91.8544	1.19893	27
Dry root yield	Advanced genotypes	TMS14F1036P0007	G23	15.4447	1	92.3693	1.20565	28
Dry root yield	Advanced genotypes	TMS13F1021P0008	G1	11.115	23	94.6239	1.23508	29
Dry root yield	Advanced genotypes	TMS14F1014P0017	G16	10.4601	37	98.0827	1.28022	30
Dry root yield	Advanced genotypes	TMS14F1146P0002	G29	9.54582	51	100.075	1.30622	31
Dry root yield	Advanced genotypes	TMS14F1310P0015	G59	12.8809	4	101.711	1.32758	32
Dry root yield	Advanced genotypes	TMS13F1049P0001	G2	9.93802	45	103.156	1.34644	33
Dry root yield	Advanced genotypes	TMS13F1304P0003	G6	9.48457	53	104.622	1.36558	34
Dry root yield	Advanced genotypes	TMS14F1301P0013	G53	12.5066	10	105.973	1.38321	35
Dry root yield	Advanced genotypes	TMS14F1306P0020	G57	11.2955	20	107.588	1.40429	36
Dry root yield	Advanced genotypes	TMS14F1022P0006	G20	11.793	18	108.386	1.4147	37
Dry root yield	Advanced genotypes	TMS13F1126P0003	G4	10.2173	40	108.623	1.4178	38
Dry root yield	Advanced genotypes	TMS14F1299P0007	G49	11.0203	27	109.02	1.42298	39
Dry root yield	Advanced genotypes	TMS13F1315P0008	G7	10.7432	30	113.779	1.48509	40
Dry root yield	Checks	TMS980581	TMS980581	10.5206	35	121.75	1.58914	41
Dry root yield	Advanced genotypes	TMS14F1311P0002	G60	9.76566	49	121.965	1.59194	42
Dry root yield	Advanced genotypes	TMS14F1292P0012	G46	9.17914	60	124.287	1.62225	43
Dry root yield	Advanced genotypes	TMS13F1114P0001	G3	9.78712	47	124.373	1.62337	44
Dry root yield	Advanced genotypes	TMS13F1376P0018	G8	11.6905	19	125.348	1.63611	45
Dry root yield	Advanced genotypes	TMS14F1300P0008	G51	10.4346	38	126.783	1.65483	46
Dry root yield	Advanced genotypes	TMS14F1131P0001	G28	10.6956	32	130.986	1.7097	47
Dry root yield	Advanced genotypes	TMS13F1461P0002	G10	9.78591	48	135.474	1.76828	48
Dry root yield	Checks	TMEB419	TMEB419	10.5104	36	137.131	1.78989	49
Dry root yield	Advanced genotypes	TMS14F1014P0016	G15	9.40732	55	137.723	1.79763	50
Dry root yield	Advanced genotypes	TMS13F1182P0002	G5	10.7391	31	143.404	1.87177	51
Dry root yield	Advanced genotypes	TMS14F1291P0003	G62	9.39981	58	146.632	1.91391	52
Dry root yield	Advanced genotypes	TMS14F1120P0003	G26	6.54971	66	151.401	1.97616	53
Dry root yield	Advanced genotypes	TMS14F1035P0007	G22	11.0974	24	156.07	2.0371	54
Dry root yield	Advanced genotypes	TMS14F1194P0002	G31	11.1555	22	158.162	2.06441	55
Dry root yield	Advanced genotypes	TMS14F1285P0017	G41	12.3465	13	160.669	2.09713	56
Dry root yield	Advanced genotypes	TMS14F1291P0012	G45	10.1125	42	170.251	2.2222	57
Dry root yield	Advanced genotypes	TMS14F1159P0003	G30	11.0949	25	181.006	2.36257	58
Dry root yield	Advanced genotypes	TMS14F1195P0004	G32	10.0728	44	181.212	2.36526	59
Dry root yield	Advanced genotypes	TMS14F1300P0002	G50	12.1566	15	183.14	2.39043	60
Dry root yield	Advanced genotypes	TMS14F1291P0011	G44	9.31202	59	186.24	2.4309	61
Dry root yield	Advanced genotypes	TMS14F1016P0006	G17	12.3598	12	208.192	2.71742	62
Dry root yield	Advanced genotypes	TMS14F1196P0003	G34	11.2462	21	227.746	2.97264	63
Dry root yield	Advanced genotypes	TMS14F1285P0006	G40	12.6846	7	247.456	3.22992	64
Dry root yield	Advanced genotypes	TMS14F1098P0013	G25	10.746	29	274.338	3.5808	65
Dry root yield	Advanced genotypes	TMS14F1297P0019	G48	9.86271	46	325.002	4.24208	66
Dry root yield	Advanced genotypes	TMS14F1208P0007	G35	9.54102	52	334.372	4.36438	67
Fibre content	Checks	TMS980581	TMS980581	1.54374	49	1.07011	0.149975	1
Fibre content	Advanced genotypes	TMS14F1291P0003	G62	1.66991	44	1.28624	0.180265	2
Fibre content	Advanced genotypes	TMS13F1126P0003	G4	1.90126	28	1.92537	0.269838	3
Fibre content	Advanced genotypes	TMS14F1300P0008	G51	1.84678	34	2.02994	0.284494	4
Fibre content	Advanced genotypes	TMS14F1300P0002	G50	1.2564	65	2.06751	0.289759	5
Fibre content	Advanced genotypes	TMS13F1400P0001	G9	1.60428	48	2.11064	0.295805	6
Fibre content	Advanced genotypes	TMS14F1301P0004	G52	1.66854	45	2.13915	0.2998	7
Fibre content	Advanced genotypes	TMS14F1301P0013	G53	1.38515	59	2.17607	0.304974	8
Fibre content	Advanced genotypes	TMS14F1049P0001	G24	1.92138	26	2.62148	0.367398	9
Fibre content	Advanced genotypes	TMS14F1019P0015	G18	1.43391	56	2.88647	0.404536	10
Fibre content	Checks	TMS982101	TMS982101	1.89603	29	2.93472	0.411299	11
Fibre content	Advanced genotypes	TMS14F1288P0008	G43	1.36241	60	3.2009	0.448604	12
Fibre content	Advanced genotypes	TMS14F1159P0003	G30	2.13709	18	3.22215	0.451582	13
Fibre content	Advanced genotypes	TMS14F1016P0006	G17	1.86305	32	3.40452	0.477141	14
Fibre content	Advanced genotypes	TMS14F1195P0004	G32	1.6602	46	3.41225	0.478224	15
Fibre content	Advanced genotypes	TMS14F1013P0007	G14	1.34578	61	3.78117	0.529928	16
Fibre content	Advanced genotypes	TMS13F1304P0003	G6	1.43521	55	3.917	0.548964	17
Fibre content	Advanced genotypes	TMS14F1125P0010	G27	1.49156	50	4.05521	0.568335	18
Fibre content	Checks	TMEB419	TMEB419	2.16973	15	4.11198	0.576291	19
Fibre content	Advanced genotypes	TMS14F1196P0003	G34	1.82344	37	4.19468	0.587881	20
Fibre content	Advanced genotypes	TMS14F1224P0004	G37	1.91553	27	4.5864	0.64278	21
Fibre content	Checks	TMS30572	TMS30572	1.72998	41	4.69888	0.658544	22
Fibre content	Advanced genotypes	TMS14F1295P0012	G47	1.30062	64	5.18433	0.72658	23
Fibre content	Advanced genotypes	TMS14F1310P0004	G58	1.41977	58	5.41836	0.759378	24
Fibre content	Advanced genotypes	TMS14F1285P0006	G40	1.71821	42	5.56745	0.780274	25
Fibre content	Advanced genotypes	TMS14F1098P0013	G25	1.7529	39	5.95873	0.835111	26
Fibre content	Advanced genotypes	TMS14F1278P0003	G39	1.98479	23	6.27349	0.879225	27
Fibre content	Checks	TMS000070	TMS000070	2.23791	14	6.37091	0.892878	28
Fibre content	Advanced genotypes	TMS14F1306P0020	G57	2.10061	19	6.53439	0.915789	29
Fibre content	Advanced genotypes	TMS13F1182P0002	G5	1.77532	38	6.97766	0.977913	30
Fibre content	Advanced genotypes	TMS13F1114P0001	G3	1.96215	25	8.33109	1.1676	31
Fibre content	Advanced genotypes	TMS14F1208P0007	G35	2.16764	16	8.4807	1.18856	32
Fibre content	Advanced genotypes	TMS14F1310P0015	G59	1.34481	62	8.50747	1.19231	33
Fibre content	Advanced genotypes	TMS14F1306P0008	G55	1.43193	57	8.51142	1.19287	34
Fibre content	Advanced genotypes	TMS13F1315P0008	G7	1.44856	53	8.6379	1.2106	35
Fibre content	Advanced genotypes	TMS14F1291P0011	G44	1.48914	51	8.69453	1.21853	36
Fibre content	Advanced genotypes	TMS14F1001P0004	G13	1.73023	40	8.77161	1.22933	37
Fibre content	Advanced genotypes	TMS14F1306P0015	G56	1.11302	67	9.06328	1.27021	38
Fibre content	Advanced genotypes	TMS14F1292P0012	G46	1.85414	33	9.18557	1.28735	39
Fibre content	Advanced genotypes	TMS14F1022P0003	G19	1.45936	52	9.62812	1.34937	40
Fibre content	Advanced genotypes	TMS14F1262P0002	G38	2.35866	10	9.90193	1.38775	41
Fibre content	Advanced genotypes	TMS14F1035P0004	G21	1.82845	36	10.2385	1.43492	42
Fibre content	Advanced genotypes	TMS14F1146P0002	G29	2.0278	21	10.4085	1.45874	43
Fibre content	Advanced genotypes	TMS14F1287P0008	G42	1.44536	54	10.5264	1.47526	44
Fibre content	Advanced genotypes	TMS14F1303P0012	G54	2.6656	4	10.6487	1.4924	45
Fibre content	Advanced genotypes	TMS14F1014P0017	G16	1.21564	66	12.1316	1.70023	46
Fibre content	Advanced genotypes	TMS14F1291P0012	G45	1.63185	47	12.4381	1.74319	47
Fibre content	Advanced genotypes	TMS14F1014P0016	G15	1.32839	63	12.7976	1.79358	48
Fibre content	Advanced genotypes	TMS14F1223P0007	G36	2.40808	7	12.8851	1.80584	49
Fibre content	Advanced genotypes	TMS13F1021P0008	G1	1.89121	30	14.1616	1.98474	50
Fibre content	Advanced genotypes	TMS13F1376P0018	G8	2.40701	8	14.576	2.04282	51
Fibre content	Advanced genotypes	TMS14F1035P0007	G22	1.88554	31	14.865	2.08331	52
Fibre content	Advanced genotypes	TMS14F1285P0017	G41	3.04439	1	15.0883	2.11462	53
Fibre content	Advanced genotypes	TMS14F1311P0002	G60	2.25288	13	16.1575	2.26446	54
Fibre content	Advanced genotypes	TMS13F1461P0002	G10	1.97656	24	16.2522	2.27774	55
Fibre content	Advanced genotypes	TMS14F1195P0005	G33	2.39272	9	16.4623	2.30718	56
Fibre content	Advanced genotypes	TMS14F1299P0007	G49	1.83876	35	18.086	2.53473	57
Fibre content	Advanced genotypes	TMS14F1297P0019	G48	2.28978	12	18.7292	2.62488	58
Fibre content	Advanced genotypes	TMS14F1036P0007	G23	2.33591	11	18.8052	2.63554	59
Fibre content	Advanced genotypes	TMS14F1022P0006	G20	2.74639	2	18.8521	2.64211	60
Fibre content	Advanced genotypes	TMS14F1194P0002	G31	2.01114	22	21.8623	3.06398	61
Fibre content	Advanced genotypes	TMS13F1049P0001	G2	1.69934	43	22.6388	3.17281	62
Fibre content	Advanced genotypes	TMS14F1312P0003	G61	2.06642	20	23.524	3.29687	63
Fibre content	Advanced genotypes	TMS13F2207P0001	G12	2.63906	5	28.7688	4.03192	64
Fibre content	Advanced genotypes	TMS13F2061P0005	G11	2.7076	3	31.0873	4.35686	65
Fibre content	Advanced genotypes	TMS14F1120P0003	G26	2.16158	17	37.5017	5.25583	66
Fibre content	Advanced genotypes	TMS14F1131P0001	G28	2.62391	6	62.2008	8.7174	67
Fresh root yield	Advanced genotypes	TMS14F1262P0002	G38	36.7664	7	124.563	0.231224	1
Fresh root yield	Advanced genotypes	TMS14F1195P0005	G33	25.8117	61	164.734	0.305794	2
Fresh root yield	Advanced genotypes	TMS14F1306P0008	G55	28.8103	44	196.002	0.363836	3
Fresh root yield	Advanced genotypes	TMS14F1223P0007	G36	32.9137	26	202.584	0.376054	4
Fresh root yield	Checks	TMS30572	TMS30572	24.6583	62	229.163	0.425392	5
Fresh root yield	Advanced genotypes	TMS14F1301P0004	G52	39.2612	5	231.358	0.429468	6
Fresh root yield	Advanced genotypes	TMS14F1306P0015	G56	34.0202	22	271.777	0.504497	7
Fresh root yield	Advanced genotypes	TMS13F2207P0001	G12	35.3974	12	286.725	0.532245	8
Fresh root yield	Advanced genotypes	TMS14F1303P0012	G54	33.5084	24	295.776	0.549046	9
Fresh root yield	Checks	TMS000070	TMS000070	39.3166	4	357.337	0.66332	10
Fresh root yield	Advanced genotypes	TMS14F1049P0001	G24	23.9176	63	376.163	0.698268	11
Fresh root yield	Advanced genotypes	TMS14F1013P0007	G14	32.1082	30	381.407	0.708001	12
Fresh root yield	Advanced genotypes	TMS13F2061P0005	G11	28.3259	46	395.108	0.733434	13
Fresh root yield	Advanced genotypes	TMS14F1022P0003	G19	35.922	10	396.049	0.735181	14
Fresh root yield	Advanced genotypes	TMS14F1035P0004	G21	35.4425	11	414.644	0.769698	15
Fresh root yield	Advanced genotypes	TMS14F1310P0004	G58	30.515	39	432.434	0.802722	16
Fresh root yield	Advanced genotypes	TMS13F1049P0001	G2	27.7562	50	435.741	0.808862	17
Fresh root yield	Advanced genotypes	TMS13F1304P0003	G6	23.7706	64	441.351	0.819275	18
Fresh root yield	Advanced genotypes	TMS14F1310P0015	G59	39.4994	3	482.617	0.895876	19
Fresh root yield	Advanced genotypes	TMS14F1301P0013	G53	35.1768	13	527.943	0.980014	20
Fresh root yield	Advanced genotypes	TMS14F1014P0017	G16	31.2246	37	533.92	0.991109	21
Fresh root yield	Advanced genotypes	TMS13F1315P0008	G7	31.3468	36	561.86	1.04297	22
Fresh root yield	Advanced genotypes	TMS14F1001P0004	G13	38.1683	6	565.932	1.05053	23
Fresh root yield	Advanced genotypes	TMS14F1278P0003	G39	29.4136	41	586.49	1.0887	24
Fresh root yield	Advanced genotypes	TMS14F1287P0008	G42	34.51	19	588.201	1.09187	25
Fresh root yield	Checks	TMS982101	TMS982101	31.1251	38	600.819	1.11529	26
Fresh root yield	Advanced genotypes	TMS14F1295P0012	G47	32.1777	28	638.065	1.18443	27
Fresh root yield	Advanced genotypes	TMS14F1288P0008	G43	20.3541	66	639.532	1.18716	28
Fresh root yield	Advanced genotypes	TMS14F1036P0007	G23	42.522	1	646.925	1.20088	29
Fresh root yield	Advanced genotypes	TMS14F1022P0006	G20	36.154	9	673.481	1.25017	30
Fresh root yield	Advanced genotypes	TMS14F1312P0003	G61	27.799	49	686.155	1.2737	31
Fresh root yield	Advanced genotypes	TMS14F1120P0003	G26	22.7045	65	716.505	1.33004	32
Fresh root yield	Advanced genotypes	TMS13F1021P0008	G1	35.0226	16	720.752	1.33792	33
Fresh root yield	Advanced genotypes	TMS14F1224P0004	G37	10.5936	67	753.328	1.39839	34
Fresh root yield	Advanced genotypes	TMS14F1146P0002	G29	28.1105	47	758.591	1.40816	35
Fresh root yield	Advanced genotypes	TMS14F1195P0004	G32	28.3985	45	774.152	1.43705	36
Fresh root yield	Advanced genotypes	TMS14F1194P0002	G31	31.6694	32	785.345	1.45783	37
Fresh root yield	Advanced genotypes	TMS13F1126P0003	G4	26.9843	57	791.946	1.47008	38
Fresh root yield	Advanced genotypes	TMS13F1400P0001	G9	25.9561	59	811.165	1.50576	39
Fresh root yield	Advanced genotypes	TMS14F1311P0002	G60	29.0105	43	811.707	1.50676	40
Fresh root yield	Advanced genotypes	TMS14F1019P0015	G18	26.9668	58	814.603	1.51214	41
Fresh root yield	Advanced genotypes	TMS13F1182P0002	G5	35.0232	15	850.715	1.57917	42
Fresh root yield	Advanced genotypes	TMS14F1291P0012	G45	27.7095	51	856.508	1.58992	43
Fresh root yield	Advanced genotypes	TMS13F1114P0001	G3	27.2794	54	895.757	1.66278	44
Fresh root yield	Advanced genotypes	TMS14F1285P0017	G41	36.296	8	897.335	1.66571	45
Fresh root yield	Advanced genotypes	TMS14F1125P0010	G27	34.902	17	912.922	1.69465	46
Fresh root yield	Checks	TMS980581	TMS980581	32.1478	29	957.281	1.77699	47
Fresh root yield	Advanced genotypes	TMS14F1131P0001	G28	31.3954	35	965.726	1.79267	48
Fresh root yield	Advanced genotypes	TMS13F1461P0002	G10	28.026	48	974.968	1.80982	49
Fresh root yield	Advanced genotypes	TMS14F1300P0008	G51	31.4126	34	1035.33	1.92187	50
Fresh root yield	Advanced genotypes	TMS13F1376P0018	G8	34.8703	18	1068.37	1.9832	51
Fresh root yield	Advanced genotypes	TMS14F1299P0007	G49	31.5889	33	1130.42	2.09838	52
Fresh root yield	Advanced genotypes	TMS14F1285P0006	G40	35.0398	14	1181.1	2.19247	53
Fresh root yield	Checks	TMEB419	TMEB419	29.4366	40	1250.53	2.32135	54
Fresh root yield	Advanced genotypes	TMS14F1306P0020	G57	34.3446	20	1264.08	2.3465	55
Fresh root yield	Advanced genotypes	TMS14F1292P0012	G46	27.0036	56	1272.38	2.36191	56
Fresh root yield	Advanced genotypes	TMS14F1300P0002	G50	34.276	21	1322.98	2.45583	57
Fresh root yield	Advanced genotypes	TMS14F1035P0007	G22	32.4032	27	1340.19	2.48778	58
Fresh root yield	Advanced genotypes	TMS14F1098P0013	G25	32.0799	31	1345.32	2.49731	59
Fresh root yield	Advanced genotypes	TMS14F1291P0003	G62	29.2997	42	1374.32	2.55114	60
Fresh root yield	Advanced genotypes	TMS14F1297P0019	G48	27.1041	55	1382.07	2.56553	61
Fresh root yield	Advanced genotypes	TMS14F1014P0016	G15	27.4201	53	1462.33	2.71451	62
Fresh root yield	Advanced genotypes	TMS14F1016P0006	G17	40.1354	2	1575.06	2.92376	63
Fresh root yield	Advanced genotypes	TMS14F1159P0003	G30	33.2636	25	1820.3	3.379	64
Fresh root yield	Advanced genotypes	TMS14F1196P0003	G34	33.7686	23	1842.29	3.41983	65
Fresh root yield	Advanced genotypes	TMS14F1208P0007	G35	27.4959	52	1885.81	3.50061	66
Fresh root yield	Advanced genotypes	TMS14F1291P0011	G44	25.83	60	1903.88	3.53416	67
fufu yield	Advanced genotypes	TMS14F1291P0012	G45	3.77468	40	5.88553	0.250612	1
fufu yield	Advanced genotypes	TMS14F1019P0015	G18	2.89902	64	6.07261	0.258578	2
fufu yield	Advanced genotypes	TMS14F1223P0007	G36	5.95116	21	7.10738	0.30264	3
fufu yield	Advanced genotypes	TMS14F1295P0012	G47	3.6772	43	8.57792	0.365257	4
fufu yield	Advanced genotypes	TMS14F1288P0008	G43	2.45548	67	11.7791	0.501567	5
fufu yield	Advanced genotypes	TMS14F1022P0003	G19	3.81813	39	11.8625	0.505116	6
fufu yield	Advanced genotypes	TMS14F1301P0013	G53	4.0517	35	12.0235	0.511971	7
fufu yield	Advanced genotypes	TMS14F1310P0004	G58	5.57334	29	12.3344	0.525211	8
fufu yield	Advanced genotypes	TMS14F1049P0001	G24	5.79774	27	12.4945	0.532027	9
fufu yield	Advanced genotypes	TMS14F1035P0004	G21	8.11575	2	12.7515	0.542971	10
fufu yield	Advanced genotypes	TMS14F1262P0002	G38	7.38497	8	12.7968	0.544903	11
fufu yield	Checks	TMS30572	TMS30572	4.29394	34	12.8073	0.545349	12
fufu yield	Advanced genotypes	TMS14F1125P0010	G27	3.51001	48	12.83	0.546312	13
fufu yield	Advanced genotypes	TMS14F1301P0004	G52	3.92539	37	13.2479	0.56411	14
fufu yield	Advanced genotypes	TMS14F1013P0007	G14	3.64886	45	13.3781	0.569652	15
fufu yield	Checks	TMS982101	TMS982101	5.85789	24	13.7955	0.587428	16
fufu yield	Advanced genotypes	TMS14F1306P0008	G55	3.38625	53	13.8339	0.58906	17
fufu yield	Advanced genotypes	TMS13F2207P0001	G12	7.40531	7	14.6886	0.625456	18
fufu yield	Advanced genotypes	TMS14F1195P0005	G33	5.13626	33	14.8891	0.633995	19
fufu yield	Advanced genotypes	TMS13F1126P0003	G4	3.17037	59	17.5808	0.748606	20
fufu yield	Advanced genotypes	TMS13F1049P0001	G2	3.33051	55	19.9576	0.849817	21
fufu yield	Advanced genotypes	TMS14F1299P0007	G49	3.39111	51	19.9885	0.851132	22
fufu yield	Advanced genotypes	TMS13F1304P0003	G6	2.85885	65	20.6052	0.877392	23
fufu yield	Advanced genotypes	TMS14F1303P0012	G54	6.59027	16	20.717	0.882151	24
fufu yield	Advanced genotypes	TMS13F1400P0001	G9	3.1778	58	21.6992	0.923975	25
fufu yield	Advanced genotypes	TMS14F1022P0006	G20	6.46308	18	22.0009	0.936822	26
fufu yield	Advanced genotypes	TMS14F1287P0008	G42	3.72979	42	23.1141	0.98422	27
fufu yield	Advanced genotypes	TMS14F1291P0011	G44	5.41916	32	24.5113	1.04371	28
fufu yield	Advanced genotypes	TMS14F1306P0020	G57	6.9407	11	25.7622	1.09698	29
fufu yield	Advanced genotypes	TMS14F1001P0004	G13	7.42971	6	30.2658	1.28875	30
fufu yield	Advanced genotypes	TMS13F1114P0001	G3	5.56999	30	31.3926	1.33673	31
fufu yield	Advanced genotypes	TMS14F1310P0015	G59	3.83108	38	33.1135	1.41001	32
fufu yield	Advanced genotypes	TMS14F1300P0008	G51	6.2882	19	33.8101	1.43967	33
fufu yield	Advanced genotypes	TMS14F1312P0003	G61	5.61966	28	33.8863	1.44291	34
fufu yield	Advanced genotypes	TMS14F1014P0017	G16	3.16021	61	34.2018	1.45635	35
fufu yield	Advanced genotypes	TMS14F1159P0003	G30	3.39868	50	34.7526	1.4798	36
fufu yield	Advanced genotypes	TMS14F1278P0003	G39	3.09393	62	35.7861	1.52381	37
fufu yield	Checks	TMS000070	TMS000070	7.51553	5	38.7483	1.64994	38
fufu yield	Advanced genotypes	TMS13F1021P0008	G1	6.84851	13	38.9696	1.65936	39
fufu yield	Advanced genotypes	TMS14F1194P0002	G31	6.49067	17	38.9979	1.66057	40
fufu yield	Advanced genotypes	TMS14F1131P0001	G28	6.87153	12	39.0701	1.66365	41
fufu yield	Advanced genotypes	TMS14F1014P0016	G15	3.19204	57	39.0951	1.66471	42
fufu yield	Advanced genotypes	TMS14F1292P0012	G46	2.7145	66	39.096	1.66475	43
fufu yield	Advanced genotypes	TMS13F1182P0002	G5	6.59975	15	39.487	1.6814	44
fufu yield	Advanced genotypes	TMS14F1120P0003	G26	3.61566	47	39.574	1.6851	45
fufu yield	Advanced genotypes	TMS13F1376P0018	G8	3.47597	49	39.6414	1.68797	46
fufu yield	Advanced genotypes	TMS14F1224P0004	G37	3.38631	52	41.3156	1.75926	47
fufu yield	Advanced genotypes	TMS14F1016P0006	G17	7.02766	10	43.2903	1.84335	48
fufu yield	Advanced genotypes	TMS14F1036P0007	G23	9.12944	1	44.1965	1.88193	49
fufu yield	Advanced genotypes	TMS14F1195P0004	G32	3.22614	56	46.5214	1.98093	50
fufu yield	Advanced genotypes	TMS14F1291P0003	G62	3.16761	60	50.2956	2.14164	51
fufu yield	Advanced genotypes	TMS14F1208P0007	G35	6.14473	20	51.4976	2.19282	52
fufu yield	Advanced genotypes	TMS13F1315P0008	G7	3.63587	46	53.828	2.29205	53
fufu yield	Checks	TMS980581	TMS980581	5.93475	22	55.4839	2.36256	54
fufu yield	Advanced genotypes	TMS14F1311P0002	G60	5.79927	26	55.5849	2.36686	55
fufu yield	Advanced genotypes	TMS14F1098P0013	G25	3.33854	54	57.37	2.44287	56
fufu yield	Advanced genotypes	TMS14F1146P0002	G29	2.95612	63	59.7696	2.54505	57
fufu yield	Advanced genotypes	TMS14F1285P0006	G40	3.76763	41	60.1644	2.56186	58
fufu yield	Checks	TMEB419	TMEB419	6.61065	14	62.1471	2.64629	59
fufu yield	Advanced genotypes	TMS13F2061P0005	G11	5.47244	31	63.2608	2.69371	60
fufu yield	Advanced genotypes	TMS13F1461P0002	G10	5.93114	23	66.6039	2.83606	61
fufu yield	Advanced genotypes	TMS14F1300P0002	G50	3.93197	36	67.224	2.86247	62
fufu yield	Advanced genotypes	TMS14F1285P0017	G41	7.62074	4	75.5806	3.2183	63
fufu yield	Advanced genotypes	TMS14F1035P0007	G22	7.04226	9	77.7864	3.31223	64
fufu yield	Advanced genotypes	TMS14F1196P0003	G34	3.6597	44	78.7869	3.35482	65
fufu yield	Advanced genotypes	TMS14F1297P0019	G48	5.85608	25	80.5634	3.43047	66
fufu yield	Advanced genotypes	TMS14F1306P0015	G56	7.71744	3	98.2127	4.182	67
fufu%	Advanced genotypes	TMS14F1300P0002	G50	6.92199	38	3.70045	0.0844619	1
gari%	Advanced genotypes	TMS14F1001P0004	G13	19.0047	42	15.7727	0.256766	1
fufu%	Advanced genotypes	TMS14F1301P0004	G52	6.35447	63	4.45187	0.101613	2
gari%	Checks	TMS980581	TMS980581	18.0445	55	17.6086	0.286652	2
fufu%	Advanced genotypes	TMS14F1013P0007	G14	6.6474	45	6.10964	0.139451	3
gari%	Advanced genotypes	TMS14F1285P0006	G40	21.8666	3	26.9618	0.438914	3
fufu%	Advanced genotypes	TMS13F1376P0018	G8	6.29798	64	6.15128	0.140402	4
gari%	Advanced genotypes	TMS14F1295P0012	G47	20.4385	12	28.9218	0.47082	4
fufu%	Advanced genotypes	TMS14F1019P0015	G18	6.67436		7.64132	0.174412	5
gari%	Advanced genotypes	TMS13F2207P0001	G12	20.2741	17	29.5717	0.4814	5
fufu%	Advanced genotypes	TMS14F1291P0003	G62	6.52204	53	10.4425	0.238348	6
gari%	Advanced genotypes	TMS14F1297P0019	G48	19.925	27	32.0158	0.521188	6
fufu%	Advanced genotypes	TMS14F1125P0010	G27	6.06197	66	13.4126	0.30614	7
gari%	Checks	TMEB419	TMEB419	20.3453	15	32.3353	0.52639	7
fufu%	Advanced genotypes	TMS14F1014P0017	G16	6.50489	55	15.7138	0.358663	8
gari%	Advanced genotypes	TMS14F1022P0003	G19	20.2575	19	34.5307	0.562129	8
fufu%	Advanced genotypes	TMS14F1299P0007	G49	6.43708	56	17.3217	0.395365	9
gari%	Advanced genotypes	TMS14F1299P0007	G49	13.3502	65	39.2801	0.639445	9
fufu%	Checks	TMS000070	TMS000070	19.5997	16	18.0947	0.413007	10
gari%	Checks	TMS000070	TMS000070	18.9561	43	44.0242	0.716674	10
fufu%	Advanced genotypes	TMS13F1126P0003	G4	6.63406	47	19.0606	0.435053	11
gari%	Advanced genotypes	TMS14F1306P0020	G57	18.7747	46	44.195	0.719454	11
fufu%	Advanced genotypes	TMS14F1288P0008	G43	6.57762	50	19.7065	0.449797	12
gari%	Advanced genotypes	TMS14F1287P0008	G42	21.535	6	44.3415	0.72184	12
fufu%	Advanced genotypes	TMS14F1287P0008	G42	6.63019	48	21.9748	0.501569	13
gari%	Advanced genotypes	TMS14F1291P0003	G62	20.3525	14	45.8849	0.746965	13
fufu%	Checks	TMEB419	TMEB419	21.2263	4	22.8659	0.52191	14
gari%	Checks	TMS982101	TMS982101	18.7071	48	46.6527	0.759463	14
fufu%	Advanced genotypes	TMS14F1301P0013	G53	6.91201	39	25.5168	0.582415	15
gari%	Advanced genotypes	TMS13F1376P0018	G8	20.0749	24	52.2244	0.850165	15
fufu%	Advanced genotypes	TMS14F1310P0004	G58	13.1827	34	25.6445	0.585331	16
gari%	Advanced genotypes	TMS14F1288P0008	G43	19.9697	26	53.9013	0.877464	16
fufu%	Advanced genotypes	TMS14F1196P0003	G34	6.56596	51	25.7826	0.588483	17
gari%	Advanced genotypes	TMS14F1036P0007	G23	21.6017	4	54.7951	0.892015	17
fufu%	Advanced genotypes	TMS13F1021P0008	G1	19.3906	18	28.043	0.640076	18
gari%	Advanced genotypes	TMS14F1300P0008	G51	19.3151	36	55.8506	0.909196	18
fufu%	Advanced genotypes	TMS14F1016P0006	G17	17.6867	28	34.0601	0.777415	19
gari%	Advanced genotypes	TMS14F1291P0012	G45	15.5359	63	59.0492	0.961268	19
fufu%	Advanced genotypes	TMS14F1285P0006	G40	6.79183	43	35.9128	0.819703	20
gari%	Advanced genotypes	TMS14F1208P0007	G35	13.3187	66	59.1473	0.962865	20
fufu%	Advanced genotypes	TMS14F1295P0012	G47	6.54515	52	36.2598	0.827621	21
gari%	Advanced genotypes	TMS13F1182P0002	G5	15.7438	62	60.5866	0.986294	21
fufu%	Advanced genotypes	TMS13F1304P0003	G6	6.35944	62	38.5407	0.879682	22
gari%	Advanced genotypes	TMS14F1224P0004	G37	6.54178	67	61.6493	1.00359	22
fufu%	Advanced genotypes	TMS14F1306P0020	G57	19.9691	12	38.6527	0.882239	23
gari%	Advanced genotypes	TMS13F2061P0005	G11	18.5302	50	64.988	1.05795	23
fufu%	Advanced genotypes	TMS13F1315P0008	G7	6.87796	40	39.1837	0.894358	24
gari%	Advanced genotypes	TMS14F1014P0017	G16	18.521	51	65.7512	1.07037	24
fufu%	Advanced genotypes	TMS14F1022P0003	G19	6.52015	54	39.841	0.909362	25
gari%	Advanced genotypes	TMS14F1131P0001	G28	19.8066	30	66.8079	1.08757	25
fufu%	Advanced genotypes	TMS14F1291P0011	G44	15.296	29	41.3601	0.944035	26
gari%	Advanced genotypes	TMS14F1196P0003	G34	20.0863	23	68.5802	1.11642	26
fufu%	Advanced genotypes	TMS14F1131P0001	G28	19.9741	11	41.5626	0.948658	27
gari%	Checks	TMS30572	TMS30572	18.0721	54	70.6533	1.15017	27
fufu%	Advanced genotypes	TMS14F1292P0012	G46	6.61161	49	42.88	0.978727	28
gari%	Advanced genotypes	TMS14F1306P0008	G55	21.5511	5	73.6143	1.19837	28
fufu%	Advanced genotypes	TMS14F1159P0003	G30	6.04564	67	45.4774	1.03801	29
gari%	Advanced genotypes	TMS14F1311P0002	G60	19.8217	29	74.0633	1.20568	29
fufu%	Advanced genotypes	TMS14F1223P0007	G36	13.2467	33	46.1097	1.05244	30
gari%	Advanced genotypes	TMS14F1285P0017	G41	20.1699	20	75.9068	1.23569	30
fufu%	Advanced genotypes	TMS14F1300P0008	G51	19.5357	17	46.358	1.05811	31
gari%	Advanced genotypes	TMS14F1301P0013	G53	20.3194	16	79.6492	1.29662	31
fufu%	Advanced genotypes	TMS13F2207P0001	G12	20.8754	6	47.6153	1.08681	32
gari%	Advanced genotypes	TMS14F1312P0003	G61	19.055	38	83.783	1.36391	32
fufu%	Advanced genotypes	TMS14F1278P0003	G39	6.42417	58	48.0358	1.09641	33
gari%	Advanced genotypes	TMS14F1013P0007	G14	20.1035	22	84.7294	1.37932	33
fufu%	Advanced genotypes	TMS14F1014P0016	G15	6.63479	46	48.4882	1.10673	34
gari yield	Advanced genotypes	TMS13F1049P0001	G2	5.93008	38	11.3003	0.336702	1
gari yield	Checks	TMS30572	TMS30572	4.48843	64	12.1845	0.36305	2
gari yield	Advanced genotypes	TMS14F1035P0004	G21	7.7281	4	14.2076	0.423329	3
gari yield	Advanced genotypes	TMS14F1291P0011	G44	5.43304	58	14.7869	0.44059	4
gari yield	Advanced genotypes	TMS14F1306P0008	G55	6.3372	28	14.9793	0.446321	5
gari yield	Advanced genotypes	TMS14F1195P0005	G33	5.48409	55	16.315	0.48612	6
gari yield	Checks	TMS000070	TMS000070	7.39	10	17.662	0.526256	7
gari yield	Advanced genotypes	TMS14F1049P0001	G24	5.2991	59	22.0023	0.655578	8
gari yield	Advanced genotypes	TMS13F2207P0001	G12	7.3128	11	22.3832	0.666929	9
gari yield	Advanced genotypes	TMS14F1288P0008	G43	4.15443	65	22.5212	0.671039	10
gari yield	Advanced genotypes	TMS14F1299P0007	G49	5.51815	51	23.9305	0.71303	11
gari yield	Advanced genotypes	TMS14F1223P0007	G36	6.52032	23	24.2976	0.723968	12
gari yield	Advanced genotypes	TMS14F1287P0008	G42	6.90686	14	24.4272	0.727829	13
gari yield	Checks	TMS982101	TMS982101	5.71053	46	25.2171	0.751365	14
gari yield	Advanced genotypes	TMS14F1310P0004	G58	5.50723	53	25.7315	0.766692	15
gari yield	Advanced genotypes	TMS14F1310P0015	G59	6.93042	13	26.5406	0.7908	16
gari yield	Advanced genotypes	TMS14F1022P0003	G19	6.84824	15	26.6853	0.795112	17
gari yield	Advanced genotypes	TMS14F1022P0006	G20	6.76101	19	27.2386	0.811598	18
gari yield	Advanced genotypes	TMS14F1262P0002	G38	7.56155	6	27.3939	0.816224	19
gari yield	Advanced genotypes	TMS14F1295P0012	G47	6.37641	27	27.442	0.817658	20
gari yield	Advanced genotypes	TMS14F1311P0002	G60	6.04187	36	31.5558	0.940234	21
gari yield	Advanced genotypes	TMS13F1182P0002	G5	5.81903	43	32.2268	0.960225	22
gari yield	Advanced genotypes	TMS14F1306P0020	G57	6.71119	21	32.5698	0.970446	23
gari yield	Advanced genotypes	TMS14F1301P0004	G52	7.51737	7	35.8762	1.06896	24
gari yield	Advanced genotypes	TMS14F1014P0016	G15	5.45058	57	35.9648	1.0716	25
gari yield	Advanced genotypes	TMS14F1125P0010	G27	5.92453	39	36.6476	1.09195	26
gari yield	Advanced genotypes	TMS14F1001P0004	G13	7.80081	3	39.0447	1.16337	27
gari yield	Advanced genotypes	TMS14F1224P0004	G37	3.54838	67	40.2835	1.20028	28
gari yield	Advanced genotypes	TMS13F2061P0005	G11	5.47542	56	40.8159	1.21615	29
gari yield	Checks	TMEB419	TMEB419	6.32355	29	41.298	1.23051	30
gari yield	Advanced genotypes	TMS13F1304P0003	G6	5.48591	54	41.4982	1.23647	31
gari yield	Advanced genotypes	TMS14F1312P0003	G61	5.58891	49	41.8109	1.24579	32
gari yield	Advanced genotypes	TMS14F1291P0012	G45	5.73411	45	41.8989	1.24842	33
gari yield	Advanced genotypes	TMS14F1035P0007	G22	6.45248	24	42.6408	1.27052	34
gari yield	Advanced genotypes	TMS14F1013P0007	G14	6.38598	26	42.9781	1.28057	35
gari yield	Checks	TMS980581	TMS980581	6.14002	35	43.3263	1.29094	36
gari yield	Advanced genotypes	TMS14F1285P0017	G41	7.44185	8	43.8355	1.30612	37
gari yield	Advanced genotypes	TMS14F1303P0012	G54	6.83627	16	44.2216	1.31762	38
gari yield	Advanced genotypes	TMS13F1400P0001	G9	4.72753	63	45.358	1.35148	39
gari yield	Advanced genotypes	TMS13F1114P0001	G3	5.6897	47	46.4591	1.38429	40
gari yield	Advanced genotypes	TMS14F1014P0017	G16	5.24732	60	47.3635	1.41124	41
gari yield	Advanced genotypes	TMS14F1131P0001	G28	6.75395	20	48.6405	1.44929	42
gari yield	Advanced genotypes	TMS14F1120P0003	G26	3.84235	66	50.7332	1.51164	43
gari yield	Advanced genotypes	TMS14F1194P0002	G31	6.24948	32	50.7698	1.51273	44
gari yield	Advanced genotypes	TMS14F1301P0013	G53	6.83585	17	53.0594	1.58095	45
gari yield	Advanced genotypes	TMS13F1021P0008	G1	6.59902	22	53.3509	1.58964	46
gari yield	Advanced genotypes	TMS14F1291P0003	G62	5.87122	41	55.0675	1.64078	47
gari yield	Advanced genotypes	TMS14F1300P0008	G51	6.27933	31	55.978	1.66791	48
gari yield	Advanced genotypes	TMS14F1159P0003	G30	5.86482	42	56.4763	1.68276	49
gari yield	Advanced genotypes	TMS14F1208P0007	G35	5.91894	40	56.6354	1.6875	50
gari yield	Advanced genotypes	TMS14F1016P0006	G17	6.79971	18	59.2267	1.76471	51
gari yield	Advanced genotypes	TMS13F1126P0003	G4	5.51159	52	61.8803	1.84378	52
gari yield	Advanced genotypes	TMS14F1146P0002	G29	5.5808	50	62.1047	1.85047	53
gari yield	Advanced genotypes	TMS14F1297P0019	G48	6.01516	37	63.0584	1.87888	54
gari yield	Advanced genotypes	TMS14F1292P0012	G46	5.11623	61	71.9151	2.14277	55
gari yield	Advanced genotypes	TMS13F1461P0002	G10	5.78948	44	74.6759	2.22503	56
gari yield	Advanced genotypes	TMS13F1315P0008	G7	6.40988	25	76.4499	2.27789	57
gari yield	Advanced genotypes	TMS13F1376P0018	G8	7.39519	9	83.4261	2.48576	58
gari yield	Advanced genotypes	TMS14F1098P0013	G25	6.22022	33	90.4872	2.69615	59
gari yield	Advanced genotypes	TMS14F1019P0015	G18	5.67213	48	90.9544	2.71007	60
gari yield	Advanced genotypes	TMS14F1195P0004	G32	5.04988	62	96.2518	2.86791	61
gari yield	Advanced genotypes	TMS14F1036P0007	G23	9.80815	1	101.873	3.0354	62
gari yield	Advanced genotypes	TMS14F1306P0015	G56	7.91162	2	104.816	3.12308	63
gari yield	Advanced genotypes	TMS14F1300P0002	G50	7.71991	5	104.915	3.12604	64
gari yield	Advanced genotypes	TMS14F1278P0003	G39	6.21147	34	130.511	3.88868	65
gari yield	Advanced genotypes	TMS14F1285P0006	G40	7.17521	12	131.478	3.9175	66
gari yield	Advanced genotypes	TMS14F1196P0003	G34	6.30266	30	196.513	5.85529	67
gari%	Advanced genotypes	TMS13F1049P0001	G2	20.7657	10	90.855	1.47904	34
fufu%	Advanced genotypes	TMS13F1461P0002	G10	20.6507	7	50.1008	1.14354	35
gari%	Advanced genotypes	TMS14F1291P0011	G44	15.0986	64	90.9221	1.48013	35
fufu%	Advanced genotypes	TMS14F1312P0003	G61	19.7618	14	53.2221	1.21478	36
gari%	Advanced genotypes	TMS14F1310P0015	G59	18.7526	47	91.0188	1.4817	36
fufu%	Advanced genotypes	TMS14F1036P0007	G23	20.9555	5	54.682	1.2481	37
gari%	Advanced genotypes	TMS14F1301P0004	G52	19.4383	35	91.1588	1.48398	37
fufu%	Advanced genotypes	TMS13F1400P0001	G9	6.97384	37	57.1632	1.30474	38
gari%	Advanced genotypes	TMS13F1126P0003	G4	20.2705	18	93.8001	1.52698	38
fufu%	Advanced genotypes	TMS14F1022P0006	G20	17.8107	27	57.3421	1.30882	39
gari%	Advanced genotypes	TMS13F1400P0001	G9	18.9519	44	95.8401	1.56019	39
fufu%	Advanced genotypes	TMS14F1306P0008	G55	6.81774	41	58.7744	1.34151	40
gari%	Advanced genotypes	TMS13F1461P0002	G10	19.0256	41	96.3658	1.56875	40
fufu%	Advanced genotypes	TMS14F1291P0012	G45	7.10019	36	59.6922	1.36246	41
gari%	Advanced genotypes	TMS14F1223P0007	G36	18.312	52	96.9419	1.57813	41
fufu%	Advanced genotypes	TMS14F1098P0013	G25	6.40529	59	62.1921	1.41952	42
gari%	Advanced genotypes	TMS14F1019P0015	G18	20.4017	13	100.406	1.63451	42
fufu%	Checks	TMS30572	TMS30572	13.2765	32	65.4338	1.49351	43
gari%	Advanced genotypes	TMS14F1195P0004	G32	19.6514	31	103.723	1.68851	43
fufu%	Advanced genotypes	TMS14F1262P0002	G38	19.8448	13	67.3694	1.53769	44
gari%	Advanced genotypes	TMS14F1159P0003	G30	18.9362	45	107.807	1.755	44
fufu%	Advanced genotypes	TMS14F1285P0017	G41	20.24	9	69.0184	1.57533	45
gari%	Advanced genotypes	TMS14F1300P0002	G50	22.0784	2	108.684	1.76927	45
fufu%	Advanced genotypes	TMS14F1195P0005	G33	14.2731	30	71.6711	1.63588	46
gari%	Advanced genotypes	TMS14F1310P0004	G58	17.2697	59	109.226	1.77809	46
fufu%	Advanced genotypes	TMS14F1224P0004	G37	6.42827	57	73.5053	1.67774	47
gari%	Advanced genotypes	TMS13F1315P0008	G7	21.038	7	115.246	1.8761	47
fufu%	Advanced genotypes	TMS14F1146P0002	G29	6.06313	65	79.0683	1.80472	48
gari%	Advanced genotypes	TMS14F1125P0010	G27	17.7642	58	115.328	1.87743	48
fufu%	Advanced genotypes	TMS14F1049P0001	G24	22.504	2	81.0848	1.85074	49
gari%	Advanced genotypes	TMS14F1262P0002	G38	20.1127	21	115.656	1.88277	49
fufu%	Advanced genotypes	TMS14F1310P0015	G59	6.36172	61	86.6866	1.9786	50
gari%	Advanced genotypes	TMS14F1303P0012	G54	19.0332	39	118.465	1.92851	50
fufu%	Advanced genotypes	TMS13F1049P0001	G2	6.81579	42	92.3484	2.10783	51
gari%	Advanced genotypes	TMS13F1021P0008	G1	18.2965	53	120.473	1.96119	51
fufu%	Advanced genotypes	TMS14F1195P0004	G32	6.39232	60	99.7887	2.27766	52
gari%	Advanced genotypes	TMS14F1292P0012	G46	19.8301	28	120.586	1.96303	52
fufu%	Advanced genotypes	TMS14F1208P0007	G35	14.2316	31	106.419	2.429	53
gari%	Advanced genotypes	TMS14F1035P0007	G22	19.0268	40	121.545	1.97865	53
fufu%	Advanced genotypes	TMS14F1001P0004	G13	18.8119	23	112.392	2.56533	54
gari%	Advanced genotypes	TMS14F1146P0002	G29	19.6252	32	125.479	2.04269	54
fufu%	Checks	TMS980581	TMS980581	18.9001	22	112.571	2.5694	55
gari%	Advanced genotypes	TMS14F1016P0006	G17	16.5694	60	129.712	2.11159	55
fufu%	Advanced genotypes	TMS14F1035P0007	G22	20.3693	8	115.864	2.64458	56
gari%	Advanced genotypes	TMS14F1195P0005	G33	19.5792	34	130.555	2.12531	56
fufu%	Advanced genotypes	TMS13F2061P0005	G11	18.4547	25	118.824	2.71214	57
gari%	Advanced genotypes	TMS14F1098P0013	G25	20.0036	25	132.743	2.16094	57
fufu%	Advanced genotypes	TMS14F1311P0002	G60	18.6869	24	120.096	2.74117	58
gari%	Advanced genotypes	TMS14F1014P0016	G15	20.5736	11	136.247	2.21797	58
fufu%	Advanced genotypes	TMS13F1182P0002	G5	17.9586	26	120.954	2.76076	59
gari%	Advanced genotypes	TMS14F1049P0001	G24	20.9741	9	158.31	2.57715	59
fufu%	Advanced genotypes	TMS14F1303P0012	G54	19.0192	20	121.104	2.76418	60
gari%	Advanced genotypes	TMS14F1022P0006	G20	17.8268	57	159.21	2.59179	60
fufu%	Advanced genotypes	TMS14F1297P0019	G48	20.1922	10	127.795	2.91688	61
gari%	Advanced genotypes	TMS14F1120P0003	G26	16.0317	61	168.343	2.74048	61
fufu%	Advanced genotypes	TMS13F1114P0001	G3	19.7535	15	133.358	3.04386	62
gari%	Advanced genotypes	TMS14F1306P0015	G56	22.2696	1	175.275	2.85332	62
fufu%	Checks	TMS982101	TMS982101	18.9587	21	169.321	3.86472	63
gari%	Advanced genotypes	TMS13F1114P0001	G3	19.2999	37	175.91	2.86365	63
fufu%	Advanced genotypes	TMS14F1120P0003	G26	11.6275	35	178.96	4.08473	64
gari%	Advanced genotypes	TMS14F1278P0003	G39	19.6083	33	179.842	2.92766	64
fufu%	Advanced genotypes	TMS14F1306P0015	G56	22.5113	1	201.921	4.6088	65
gari%	Advanced genotypes	TMS14F1194P0002	G31	17.9379	56	184.697	3.0067	65
fufu%	Advanced genotypes	TMS14F1035P0004	G21	22.4903	3	215.96	4.92924	66
gari%	Advanced genotypes	TMS13F1304P0003	G6	18.6887	49	205.824	3.35063	66
fufu%	Advanced genotypes	TMS14F1194P0002	G31	19.2986	19	224.546	5.12521	67
gari%	Advanced genotypes	TMS14F1035P0004	G21	21.0241	8	228.83	3.72514	67
Harvest index	Advanced genotypes	TMS14F1001P0004	G13	0.574696	20	0.00657453	0.151004	1
Harvest index	Advanced genotypes	TMS14F1022P0003	G19	0.595022	15	0.0100321	0.230417	2
Harvest index	Advanced genotypes	TMS13F1126P0003	G4	0.58408	19	0.0108551	0.24932	3
Harvest index	Advanced genotypes	TMS14F1262P0002	G38	0.558285	31	0.0135268	0.310684	4
Harvest index	Advanced genotypes	TMS14F1022P0006	G20	0.605097	9	0.0147173	0.338026	5
Harvest index	Advanced genotypes	TMS14F1224P0004	G37	0.669956	1	0.0157122	0.360878	6
Harvest index	Advanced genotypes	TMS14F1300P0008	G51	0.498875	56	0.0183734	0.422	7
Harvest index	Advanced genotypes	TMS14F1036P0007	G23	0.570476	23	0.0184515	0.423794	8
Harvest index	Advanced genotypes	TMS14F1194P0002	G31	0.539943	38	0.0187436	0.430503	9
Harvest index	Advanced genotypes	TMS14F1306P0015	G56	0.53338	41	0.0189952	0.436281	10
Harvest index	Advanced genotypes	TMS14F1306P0020	G57	0.55418	32	0.0205262	0.471445	11
Harvest index	Advanced genotypes	TMS14F1223P0007	G36	0.649766	4	0.02072	0.475896	12
Harvest index	Advanced genotypes	TMS14F1303P0012	G54	0.498296	57	0.0208722	0.479393	13
Harvest index	Advanced genotypes	TMS14F1019P0015	G18	0.526589	44	0.0211232	0.485157	14
Harvest index	Advanced genotypes	TMS14F1035P0007	G22	0.602287	11	0.0245985	0.564977	15
Harvest index	Checks	TMS000070	TMS000070	0.607908	8	0.0265911	0.610744	16
Harvest index	Advanced genotypes	TMS14F1291P0012	G45	0.538358	39	0.0273248	0.627594	17
Harvest index	Advanced genotypes	TMS13F2061P0005	G11	0.493513	59	0.027825	0.639085	18
Harvest index	Advanced genotypes	TMS14F1049P0001	G24	0.488016	61	0.0281794	0.647223	19
Harvest index	Advanced genotypes	TMS14F1013P0007	G14	0.541999	36	0.0301243	0.691893	20
Harvest index	Advanced genotypes	TMS13F2207P0001	G12	0.551428	33	0.0322963	0.741781	21
Harvest index	Advanced genotypes	TMS14F1195P0005	G33	0.511961	49	0.0352706	0.810094	22
Harvest index	Advanced genotypes	TMS14F1287P0008	G42	0.545207	35	0.0359743	0.826257	23
Harvest index	Checks	TMS982101	TMS982101	0.490884	60	0.03649	0.838102	24
Harvest index	Advanced genotypes	TMS14F1035P0004	G21	0.666292	2	0.0371599	0.853489	25
Harvest index	Checks	TMS30572	TMS30572	0.48701	62	0.0380737	0.874476	26
Harvest index	Advanced genotypes	TMS13F1021P0008	G1	0.53351	40	0.0400476	0.919812	27
Harvest index	Advanced genotypes	TMS14F1310P0004	G58	0.585004	18	0.040486	0.929882	28
Harvest index	Checks	TMS980581	TMS980581	0.516487	46	0.0405351	0.931009	29
Harvest index	Advanced genotypes	TMS13F1315P0008	G7	0.507206	52	0.0432268	0.992833	30
Harvest index	Advanced genotypes	TMS14F1295P0012	G47	0.562496	28	0.0434792	0.99863	31
Harvest index	Advanced genotypes	TMS13F1182P0002	G5	0.513345	48	0.0530368	1.21815	32
Harvest index	Advanced genotypes	TMS13F1461P0002	G10	0.497381	58	0.0531678	1.22116	33
Harvest index	Advanced genotypes	TMS14F1306P0008	G55	0.527162	43	0.0543036	1.24724	34
Harvest index	Advanced genotypes	TMS14F1159P0003	G30	0.562676	27	0.0550966	1.26546	35
Harvest index	Advanced genotypes	TMS14F1285P0017	G41	0.660728	3	0.0565739	1.29939	36
Harvest index	Advanced genotypes	TMS14F1285P0006	G40	0.592985	17	0.0574777	1.32015	37
Harvest index	Advanced genotypes	TMS14F1016P0006	G17	0.600708	12	0.0579849	1.3318	38
Harvest index	Advanced genotypes	TMS13F1114P0001	G3	0.502353	54	0.058718	1.34863	39
Harvest index	Advanced genotypes	TMS14F1131P0001	G28	0.596374	13	0.060035	1.37888	40
Harvest index	Advanced genotypes	TMS14F1146P0002	G29	0.568466	24	0.0603005	1.38498	41
Harvest index	Advanced genotypes	TMS14F1098P0013	G25	0.574572	21	0.0626284	1.43845	42
Harvest index	Advanced genotypes	TMS14F1278P0003	G39	0.574414	22	0.0632943	1.45374	43
Harvest index	Advanced genotypes	TMS14F1311P0002	G60	0.508375	50	0.0645369	1.48228	44
Harvest index	Advanced genotypes	TMS14F1208P0007	G35	0.561551	29	0.0713828	1.63952	45
Harvest index	Advanced genotypes	TMS14F1125P0010	G27	0.566994	25	0.0728923	1.67419	46
Harvest index	Advanced genotypes	TMS14F1301P0013	G53	0.561041	30	0.0738206	1.69551	47
Harvest index	Advanced genotypes	TMS14F1014P0016	G15	0.502252	55	0.0739298	1.69802	48
Harvest index	Advanced genotypes	TMS14F1301P0004	G52	0.54102	37	0.0832626	1.91237	49
Harvest index	Advanced genotypes	TMS13F1049P0001	G2	0.51384	47	0.0888828	2.04146	50
Harvest index	Advanced genotypes	TMS13F1304P0003	G6	0.624044	6	0.0901423	2.07039	51
Harvest index	Advanced genotypes	TMS14F1120P0003	G26	0.399986	67	0.0913631	2.09843	52
Harvest index	Advanced genotypes	TMS14F1297P0019	G48	0.449962	66	0.0917586	2.10751	53
Harvest index	Advanced genotypes	TMS14F1195P0004	G32	0.563832	26	0.0953107	2.18909	54
Harvest index	Advanced genotypes	TMS14F1196P0003	G34	0.604213	10	0.097447	2.23816	55
Harvest index	Advanced genotypes	TMS14F1291P0011	G44	0.594866	16	0.100014	2.29712	56
Harvest index	Advanced genotypes	TMS13F1400P0001	G9	0.479696	63	0.103594	2.37935	57
Harvest index	Checks	TMEB419	TMEB419	0.504385	53	0.104373	2.39724	58
Harvest index	Advanced genotypes	TMS14F1310P0015	G59	0.625189	5	0.10591	2.43253	59
Harvest index	Advanced genotypes	TMS14F1312P0003	G61	0.475175	65	0.135942	3.1223	60
Harvest index	Advanced genotypes	TMS14F1300P0002	G50	0.549767	34	0.136665	3.13892	61
Harvest index	Advanced genotypes	TMS14F1288P0008	G43	0.507651	51	0.138841	3.18889	62
Harvest index	Advanced genotypes	TMS14F1291P0003	G62	0.596108	14	0.143404	3.29369	63
Harvest index	Advanced genotypes	TMS14F1014P0017	G16	0.528062	42	0.157115	3.60862	64
Harvest index	Advanced genotypes	TMS14F1299P0007	G49	0.518818	45	0.173986	3.99611	65
Harvest index	Advanced genotypes	TMS13F1376P0018	G8	0.610497	7	0.207299	4.76125	66
Harvest index	Advanced genotypes	TMS14F1292P0012	G46	0.478462	64	0.342491	7.86633	67
Peel loss	Advanced genotypes	TMS14F1224P0004	G37	6.87646	67	22.2185	0.220997	1
Peel loss	Advanced genotypes	TMS14F1223P0007	G36	22.175	17	27.6255	0.274778	2
Peel loss	Advanced genotypes	TMS14F1301P0004	G52	20.1403	37	28.1101	0.279598	3
Peel loss	Checks	TMS980581	TMS980581	23.3436	11	32.1495	0.319776	4
Peel loss	Advanced genotypes	TMS13F2207P0001	G12	19.9176	41	33.5064	0.333272	5
Peel loss	Advanced genotypes	TMS14F1301P0013	G53	21.1932	26	34.6276	0.344425	6
Peel loss	Advanced genotypes	TMS14F1299P0007	G49	14.4072	64	42.6759	0.424477	7
Peel loss	Checks	TMS30572	TMS30572	20.5275	33	43.7011	0.434674	8
Peel loss	Checks	TMS000070	TMS000070	17.6723	60	51.1966	0.509229	9
Peel loss	Advanced genotypes	TMS14F1300P0002	G50	18.2879	57	51.8842	0.516068	10
Peel loss	Advanced genotypes	TMS14F1016P0006	G17	20.4863	35	60.7667	0.604417	11
Peel loss	Advanced genotypes	TMS14F1285P0006	G40	19.1919	47	62.5385	0.622041	12
Peel loss	Advanced genotypes	TMS14F1262P0002	G38	18.6533	52	64.8552	0.645084	13
Peel loss	Advanced genotypes	TMS14F1303P0012	G54	20.7321	31	66.8523	0.664948	14
Peel loss	Advanced genotypes	TMS14F1036P0007	G23	19.1126	48	68.8816	0.685133	15
Peel loss	Advanced genotypes	TMS14F1001P0004	G13	18.6576	51	80.6012	0.801702	16
Peel loss	Advanced genotypes	TMS14F1125P0010	G27	18.3105	56	83.1281	0.826836	17
Peel loss	Advanced genotypes	TMS14F1292P0012	G46	21.5865	22	84.0152	0.83566	18
Peel loss	Advanced genotypes	TMS14F1208P0007	G35	14.7947	63	86.1063	0.856458	19
Peel loss	Advanced genotypes	TMS14F1291P0003	G62	17.7579	59	88.4389	0.87966	20
Peel loss	Advanced genotypes	TMS14F1306P0008	G55	19.7286	43	93.6437	0.93143	21
Peel loss	Advanced genotypes	TMS14F1049P0001	G24	24.0399	6	95.9095	0.953967	22
Peel loss	Advanced genotypes	TMS14F1194P0002	G31	25.3571	2	97.6	0.970781	23
Peel loss	Advanced genotypes	TMS13F2061P0005	G11	20.6773	32	97.8442	0.97321	24
Peel loss	Checks	TMS982101	TMS982101	17.1301	61	98.6645	0.981369	25
Peel loss	Advanced genotypes	TMS13F1021P0008	G1	19.3128	44	100.859	1.0032	26
Peel loss	Advanced genotypes	TMS14F1195P0004	G32	23.652	8	108.304	1.07725	27
Peel loss	Advanced genotypes	TMS14F1013P0007	G14	18.7092	50	112.487	1.11886	28
Peel loss	Advanced genotypes	TMS14F1300P0008	G51	21.255	25	113.193	1.12588	29
Peel loss	Advanced genotypes	TMS14F1120P0003	G26	22.2232	16	114.506	1.13893	30
Peel loss	Advanced genotypes	TMS14F1291P0012	G45	12.6852	66	119.521	1.18882	31
Peel loss	Advanced genotypes	TMS14F1291P0011	G44	12.9274	65	127.689	1.27006	32
Peel loss	Advanced genotypes	TMS14F1287P0008	G42	21.5183	23	127.743	1.2706	33
Peel loss	Advanced genotypes	TMS14F1022P0006	G20	22.5217	14	129.412	1.2872	34
Peel loss	Advanced genotypes	TMS13F1315P0008	G7	20.5166	34	129.71	1.29017	35
Peel loss	Advanced genotypes	TMS14F1285P0017	G41	15.8239	62	131.748	1.31044	36
Peel loss	Advanced genotypes	TMS14F1306P0020	G57	24.1991	5	131.813	1.31109	37
Peel loss	Advanced genotypes	TMS13F1376P0018	G8	17.8005	58	132.783	1.32073	38
Peel loss	Advanced genotypes	TMS14F1295P0012	G47	20.1392	38	135.03	1.34308	39
Peel loss	Advanced genotypes	TMS14F1310P0015	G59	21.6081	21	141.234	1.40479	40
Peel loss	Advanced genotypes	TMS14F1297P0019	G48	21.0725	27	155.891	1.55057	41
Peel loss	Advanced genotypes	TMS14F1014P0016	G15	20.9292	29	157.641	1.56798	42
Peel loss	Advanced genotypes	TMS13F1400P0001	G9	22.6178	13	160.882	1.60022	43
Peel loss	Advanced genotypes	TMS13F1304P0003	G6	21.8393	19	160.903	1.60043	44
Peel loss	Advanced genotypes	TMS14F1306P0015	G56	18.5614	54	162.917	1.62046	45
Peel loss	Advanced genotypes	TMS14F1311P0002	G60	20.8095	30	172.442	1.7152	46
Peel loss	Advanced genotypes	TMS14F1146P0002	G29	22.4017	15	172.95	1.72025	47
Peel loss	Advanced genotypes	TMS14F1159P0003	G30	21.998	18	182.802	1.81824	48
Peel loss	Advanced genotypes	TMS13F1049P0001	G2	21.3751	24	191.414	1.9039	49
Peel loss	Advanced genotypes	TMS14F1098P0013	G25	19.9611	39	194.668	1.93627	50
Peel loss	Checks	TMEB419	TMEB419	18.9163	49	195.392	1.94347	51
Peel loss	Advanced genotypes	TMS14F1019P0015	G18	20.195	36	199.157	1.98092	52
Peel loss	Advanced genotypes	TMS14F1022P0003	G19	23.6767	7	206.768	2.05662	53
Peel loss	Advanced genotypes	TMS13F1126P0003	G4	23.154	12	217.847	2.16682	54
Peel loss	Advanced genotypes	TMS13F1461P0002	G10	19.9599	40	228.578	2.27356	55
Peel loss	Advanced genotypes	TMS14F1312P0003	G61	25.7287	1	263.372	2.61964	56
Peel loss	Advanced genotypes	TMS14F1196P0003	G34	19.8995	42	280.79	2.79289	57
Peel loss	Advanced genotypes	TMS14F1310P0004	G58	20.9978	28	293.095	2.91528	58
Peel loss	Advanced genotypes	TMS14F1035P0004	G21	18.3534	55	302.968	3.01348	59
Peel loss	Advanced genotypes	TMS14F1131P0001	G28	19.2348	45	313.058	3.11384	60
Peel loss	Advanced genotypes	TMS14F1288P0008	G43	25.2818	3	314.153	3.12473	61
Peel loss	Advanced genotypes	TMS13F1114P0001	G3	23.475	9	315.299	3.13613	62
Peel loss	Advanced genotypes	TMS14F1035P0007	G22	19.2322	46	322.329	3.20605	63
Peel loss	Advanced genotypes	TMS14F1195P0005	G33	23.4391	10	329.823	3.28059	64
Peel loss	Advanced genotypes	TMS14F1014P0017	G16	24.4272	4	345.862	3.44013	65
Peel loss	Advanced genotypes	TMS14F1278P0003	G39	18.6362	53	360.176	3.5825	66
Peel loss	Advanced genotypes	TMS13F1182P0002	G5	21.6119	20	399.009	3.96875	67
Root number	Advanced genotypes	TMS14F1001P0004	G13	111.642	40	1662.34	0.240225	1
Root number	Advanced genotypes	TMS14F1287P0008	G42	92.1503	60	1829.27	0.264349	2
Root number	Checks	TMS982101	TMS982101	85.7074	66	2375.47	0.34328	3
Root number	Advanced genotypes	TMS14F1224P0004	G37	141.499	5	2946.81	0.425846	4
Root number	Advanced genotypes	TMS14F1014P0016	G15	128.471	15	3454.78	0.499253	5
Root number	Advanced genotypes	TMS14F1146P0002	G29	133.736	12	3516.04	0.508105	6
Root number	Advanced genotypes	TMS13F2207P0001	G12	101.062	51	3561.2	0.514632	7
Root number	Advanced genotypes	TMS14F1306P0015	G56	89.8219	64	3676.78	0.531333	8
Root number	Advanced genotypes	TMS14F1022P0006	G20	126.978	18	4142.5	0.598635	9
Root number	Advanced genotypes	TMS14F1125P0010	G27	95.5187	56	4315.73	0.623669	10
Root number	Advanced genotypes	TMS14F1195P0005	G33	112.527	37	4483.43	0.647904	11
Root number	Advanced genotypes	TMS14F1306P0008	G55	91.7929	61	4594.44	0.663945	12
Root number	Advanced genotypes	TMS14F1299P0007	G49	161.479	2	5032.74	0.727285	13
Root number	Advanced genotypes	TMS14F1196P0003	G34	129.62	14	5056.01	0.730648	14
Root number	Advanced genotypes	TMS14F1278P0003	G39	106.181	43	5212.69	0.753289	15
Root number	Advanced genotypes	TMS13F1182P0002	G5	99.1505	55	5324.15	0.769397	16
Root number	Advanced genotypes	TMS14F1295P0012	G47	123.972	21	5637.32	0.814652	17
Root number	Checks	TMS000070	TMS000070	121.361	24	5754.6	0.831601	18
Root number	Checks	TMS980581	TMS980581	91.7471	62	6079.58	0.878564	19
Root number	Advanced genotypes	TMS14F1303P0012	G54	103.584	46	6094.2	0.880677	20
Root number	Advanced genotypes	TMS14F1019P0015	G18	103.471	47	6211.73	0.897661	21
Root number	Advanced genotypes	TMS13F1376P0018	G8	101.753	49	6312.16	0.912174	22
Root number	Advanced genotypes	TMS13F2061P0005	G11	94.5782	58	6346.56	0.917145	23
Root number	Advanced genotypes	TMS14F1285P0006	G40	103.788	45	7140.51	1.03188	24
Root number	Advanced genotypes	TMS14F1310P0004	G58	133.996	10	7429.23	1.0736	25
Root number	Advanced genotypes	TMS14F1310P0015	G59	155.086	3	7891.41	1.14039	26
Root number	Checks	TMS30572	TMS30572	100.795	52	7966.06	1.15118	27
Root number	Advanced genotypes	TMS14F1301P0013	G53	93.0165	59	7972.37	1.15209	28
Root number	Advanced genotypes	TMS14F1208P0007	G35	168.477	1	7981.16	1.15336	29
Root number	Advanced genotypes	TMS14F1120P0003	G26	117.915	32	8150.77	1.17787	30
Root number	Advanced genotypes	TMS14F1285P0017	G41	130.551	13	8187.29	1.18315	31
Root number	Advanced genotypes	TMS13F1114P0001	G3	114.548	34	8612.1	1.24454	32
Root number	Advanced genotypes	TMS14F1291P0003	G62	120.374	27	8637.03	1.24814	33
Root number	Advanced genotypes	TMS14F1262P0002	G38	112.59	36	8663.42	1.25196	34
Root number	Advanced genotypes	TMS14F1016P0006	G17	141.358	6	8911.15	1.28776	35
Root number	Advanced genotypes	TMS14F1223P0007	G36	124.763	19	9456.41	1.36655	36
Root number	Advanced genotypes	TMS14F1014P0017	G16	121.473	23	9557.42	1.38115	37
Root number	Advanced genotypes	TMS13F1049P0001	G2	102.882	48	9591.53	1.38608	38
Root number	Advanced genotypes	TMS14F1311P0002	G60	136.626	9	9745.49	1.40833	39
Root number	Checks	TMEB419	TMEB419	120.473	26	10101.2	1.45974	40
Root number	Advanced genotypes	TMS14F1131P0001	G28	90.4689	63	10206.8	1.47499	41
Root number	Advanced genotypes	TMS13F1315P0008	G7	118.12	31	10321.1	1.49152	42
Root number	Advanced genotypes	TMS14F1159P0003	G30	28.9206	67	10345.8	1.49507	43
Root number	Advanced genotypes	TMS13F1400P0001	G9	110.121	41	10784	1.5584	44
Root number	Advanced genotypes	TMS14F1194P0002	G31	112.124	38	10796.1	1.56015	45
Root number	Advanced genotypes	TMS14F1035P0007	G22	124.262	20	11001.1	1.58977	46
Root number	Advanced genotypes	TMS14F1022P0003	G19	121.994	22	11004.4	1.59025	47
Root number	Advanced genotypes	TMS13F1304P0003	G6	127.1	17	11068.9	1.59958	48
Root number	Advanced genotypes	TMS13F1461P0002	G10	105.08	44	11416	1.64973	49
Root number	Advanced genotypes	TMS14F1300P0008	G51	140.509	7	11722.5	1.69403	50
Root number	Advanced genotypes	TMS13F1021P0008	G1	109.354	42	12681.5	1.83261	51
Root number	Advanced genotypes	TMS14F1306P0020	G57	119.226	30	12714.9	1.83744	52
Root number	Advanced genotypes	TMS13F1126P0003	G4	149.029	4	13172.9	1.90363	53
Root number	Advanced genotypes	TMS14F1291P0012	G45	89.0819	65	13777.3	1.99097	54
Root number	Advanced genotypes	TMS14F1300P0002	G50	120.974	25	13918	2.0113	55
Root number	Advanced genotypes	TMS14F1035P0004	G21	111.999	39	14572.2	2.10584	56
Root number	Advanced genotypes	TMS14F1049P0001	G24	112.62	35	15237.5	2.20199	57
Root number	Advanced genotypes	TMS14F1301P0004	G52	127.957	16	16143.1	2.33285	58
Root number	Advanced genotypes	TMS14F1036P0007	G23	101.512	50	17015.7	2.45895	59
Root number	Advanced genotypes	TMS14F1195P0004	G32	116.003	33	19049.7	2.75288	60
Root number	Advanced genotypes	TMS14F1312P0003	G61	100.723	53	19733.5	2.85171	61
Root number	Advanced genotypes	TMS14F1098P0013	G25	119.707	29	20871.2	3.01612	62
Root number	Advanced genotypes	TMS14F1013P0007	G14	100.154	54	21900.6	3.16488	63
Root number	Advanced genotypes	TMS14F1288P0008	G43	120.152	28	28175.5	4.07167	64
Root number	Advanced genotypes	TMS14F1292P0012	G46	137.22	8	30860.4	4.45965	65
Root number	Advanced genotypes	TMS14F1297P0019	G48	94.6529	57	31633.2	4.57133	66
Root number	Advanced genotypes	TMS14F1291P0011	G44	133.811	11	32251.4	4.66067	67
Root size	Advanced genotypes	TMS14F1292P0012	G46	5.07524	48	0.929268	0.184092	1
Root size	Advanced genotypes	TMS14F1035P0004	G21	5.56184	22	1.36992	0.271388	2
Root size	Advanced genotypes	TMS14F1310P0015	G59	5.55089	24	1.36992	0.271388	3
Root size	Advanced genotypes	TMS13F1049P0001	G2	5.00488	53	1.50153	0.29746	4
Root size	Advanced genotypes	TMS14F1013P0007	G14	5.58671	20	1.50153	0.29746	5
Root size	Advanced genotypes	TMS14F1297P0019	G48	6.32365	1	1.56087	0.309216	6
Root size	Advanced genotypes	TMS13F1461P0002	G10	4.81275	64	1.56087	0.309216	7
Root size	Checks	TMS30572	TMS30572	5.6488	16	1.93118	0.382576	8
Root size	Advanced genotypes	TMS14F1223P0007	G36	5.15752	43	2.91413	0.577302	9
Root size	Advanced genotypes	TMS13F2061P0005	G11	5.68143	12	2.93841	0.582112	10
Root size	Advanced genotypes	TMS14F1288P0008	G43	5.49241	26	2.95065	0.584536	11
Root size	Advanced genotypes	TMS14F1208P0007	G35	5.60692	18	3.33542	0.660762	12
Root size	Advanced genotypes	TMS14F1300P0008	G51	5.63722	17	3.43109	0.679714	13
Root size	Advanced genotypes	TMS14F1301P0004	G52	4.96241	56	3.49079	0.691541	14
Root size	Advanced genotypes	TMS14F1036P0007	G23	5.59877	19	3.58441	0.710088	15
Root size	Advanced genotypes	TMS13F1400P0001	G9	5.23906	36	4.15789	0.823696	16
Root size	Advanced genotypes	TMS14F1098P0013	G25	4.96403	55	4.15789	0.823696	17
Root size	Advanced genotypes	TMS13F1182P0002	G5	5.29902	34	4.26505	0.844926	18
Root size	Advanced genotypes	TMS14F1303P0012	G54	5.79558	5	4.27048	0.846001	19
Root size	Advanced genotypes	TMS13F1114P0001	G3	5.51093	25	4.78805	0.948533	20
Root size	Advanced genotypes	TMS14F1194P0002	G31	6.09907	2	4.83125	0.95709	21
Root size	Advanced genotypes	TMS14F1014P0016	G15	4.95738	57	4.96805	0.984192	22
Root size	Advanced genotypes	TMS13F2207P0001	G12	5.16262	42	4.98724	0.987994	23
Root size	Advanced genotypes	TMS14F1120P0003	G26	5.19447	38	5.26638	1.04329	24
Root size	Advanced genotypes	TMS14F1195P0005	G33	5.43566	29	5.50346	1.09026	25
Root size	Advanced genotypes	TMS14F1022P0006	G20	4.9115	61	5.59513	1.10842	26
Root size	Checks	TMS982101	TMS982101	5.11826	47	5.63647	1.11661	27
Root size	Advanced genotypes	TMS14F1049P0001	G24	5.45746	27	5.77354	1.14376	28
Root size	Advanced genotypes	TMS14F1312P0003	G61	5.68527	10	5.8058	1.15015	29
Root size	Advanced genotypes	TMS14F1196P0003	G34	5.82566	3	5.83644	1.15622	30
Root size	Advanced genotypes	TMS14F1014P0017	G16	5.78579	6	5.96638	1.18197	31
Root size	Advanced genotypes	TMS14F1301P0013	G53	4.84227	63	6.33506	1.255	32
Root size	Advanced genotypes	TMS14F1306P0015	G56	5.36789	32	6.33506	1.255	33
Root size	Advanced genotypes	TMS14F1035P0007	G22	5.41828	30	6.48832	1.28536	34
Root size	Advanced genotypes	TMS14F1291P0011	G44	5.55626	23	7.02082	1.39085	35
Root size	Checks	TMS980581	TMS980581	5.81022	4	7.29812	1.44579	36
Root size	Checks	TMEB419	TMEB419	4.56727	65	7.88857	1.56276	37
Root size	Advanced genotypes	TMS14F1291P0003	G62	5.56472	21	7.89271	1.56358	38
Root size	Advanced genotypes	TMS14F1195P0004	G32	5.05326	51	7.89518	1.56407	39
Root size	Advanced genotypes	TMS14F1310P0004	G58	5.28411	35	8.26792	1.63791	40
Root size	Advanced genotypes	TMS13F1021P0008	G1	5.14504	46	8.65713	1.71501	41
Root size	Advanced genotypes	TMS14F1019P0015	G18	5.66165	15	8.82008	1.7473	42
Root size	Advanced genotypes	TMS14F1022P0003	G19	4.95364	58	8.82206	1.74769	43
Root size	Advanced genotypes	TMS14F1001P0004	G13	4.87537	62	8.84921	1.75307	44
Root size	Advanced genotypes	TMS14F1146P0002	G29	5.44336	28	8.868	1.75679	45
Root size	Checks	TMS000070	TMS000070	5.17188	40	9.05674	1.79418	46
Root size	Advanced genotypes	TMS13F1376P0018	G8	5.04889	52	9.21397	1.82533	47
Root size	Advanced genotypes	TMS14F1278P0003	G39	5.76612	8	9.5808	1.898	48
Root size	Advanced genotypes	TMS14F1262P0002	G38	4.35827	66	9.59392	1.9006	49
Root size	Advanced genotypes	TMS14F1300P0002	G50	5.19907	37	9.83474	1.9483	50
Root size	Advanced genotypes	TMS13F1304P0003	G6	5.71313	9	9.97664	1.97642	51
Root size	Advanced genotypes	TMS14F1285P0006	G40	5.16867	41	10.2013	2.02092	52
Root size	Advanced genotypes	TMS14F1125P0010	G27	5.071	49	10.3571	2.05178	53
Root size	Advanced genotypes	TMS14F1306P0020	G57	5.66591	13	10.4331	2.06684	54
Root size	Advanced genotypes	TMS14F1224P0004	G37	5.68247	11	10.7102	2.12174	55
Root size	Advanced genotypes	TMS14F1306P0008	G55	5.66292	14	10.7288	2.12542	56
Root size	Advanced genotypes	TMS14F1131P0001	G28	5.77903	7	11.2661	2.23187	57
Root size	Advanced genotypes	TMS13F1315P0008	G7	5.19117	39	11.3043	2.23943	58
Root size	Advanced genotypes	TMS14F1159P0003	G30	3.4527	67	11.5766	2.29338	59
Root size	Advanced genotypes	TMS14F1295P0012	G47	5.35052	33	12.474	2.47115	60
Root size	Advanced genotypes	TMS14F1016P0006	G17	4.99353	54	14.0621	2.78577	61
Root size	Advanced genotypes	TMS14F1299P0007	G49	5.06597	50	14.3211	2.83707	62
Root size	Advanced genotypes	TMS14F1287P0008	G42	5.14626	45	16.3743	3.24383	63
Root size	Advanced genotypes	TMS14F1285P0017	G41	4.93136	60	16.9261	3.35313	64
Root size	Advanced genotypes	TMS14F1291P0012	G45	5.41081	31	19.5409	3.87113	65
Root size	Advanced genotypes	TMS13F1126P0003	G4	5.14738	44	20.5486	4.07077	66
Root size	Advanced genotypes	TMS14F1311P0002	G60	4.9331	59	21.0853	4.1771	67
